# Supplementary material for: Study on carbapenemase-producing bacteria by matrix-assisted laser desorption/ionization approach
Source: PLoS One. 2021 Mar 18;16(3):e0247369. doi: 10.1371/journal.pone.0247369 (PMC7971901; doi:10.1371/journal.pone.0247369)
Supplement: S3 Data — nhydrInt 300.2"—the signal intensity of the unhydrolyzed imipenem [M+H]+; "nhydrInt 489"—the signal intensity of undhydrolyzed imipenem in an adduct form; "calInt"—intensity of the calibrator used (m/z 607.3); "deltaC"—differences between logRQ of positive and negative control. (CSV) [file pone.0247369.s005.csv]

Strain	Variant	logRQ	nhydrInt 300.2	nhydrInt 489	calInt	normVal	deltaC
Pseudomonas aeruginosa 4	2_5	-0.25	34652.84178	25807.12422	34349.36399	0.09	1.92
Pseudomonas aeruginosa 4	2_5	-0.19	21927.71067	26449.95673	31063.38879	0.12	1.92
Pseudomonas aeruginosa 4	2_5	-0.25	32607.32759	28826.9921	34380.86152	0.09	1.92
Pseudomonas aeruginosa 4	2_5	-0.24	30569.64462	28951.60423	34165.88509	0.09	1.92
Pseudomonas aeruginosa 4	3_0	0.21	14037.14304	13592.18002	45216.32623	0.33	1.92
Pseudomonas aeruginosa 4	3_0	0.15	11630.159	9921.727247	30408.0804	0.3	1.92
Pseudomonas aeruginosa 4	3_0	0.15	14204.19656	13755.80309	39845.89493	0.3	1.92
Pseudomonas aeruginosa 4	3_0	0.14	12818.99852	11673.01556	34075.35182	0.29	1.92
Pseudomonas aeruginosa 4	3_5	0.36	9777.786023	3739.461911	31067.63241	0.41	1.92
Pseudomonas aeruginosa 4	3_5	0.28	13051.14253	5090.011661	34185.7426	0.36	1.92
Pseudomonas aeruginosa 4	3_5	0.32	5944.112376	4608.236756	22054.65457	0.39	1.92
Pseudomonas aeruginosa 4	3_5	0.34	6690.852512	4559.022916	24895.11206	0.4	1.92
Pseudomonas aeruginosa 4	4_0	0.98	2025.191794	1696.415853	35674.40063	0.73	1.92
Pseudomonas aeruginosa 4	4_0	1.08	1589.731974	955.511091	30536.50407	0.78	1.92
Pseudomonas aeruginosa 4	4_0	0.84	2646.461	2634.942248	36211.38477	0.66	1.92
Pseudomonas aeruginosa 4	4_0	0.81	3170.623867	2665.183418	37349.55342	0.64	1.92
Pseudomonas aeruginosa 4	5_0	1.35	946.4845555	240.5300147	26477.35781	0.92	1.92
Pseudomonas aeruginosa 4	5_0	1.24	1641.749579	307.2119912	33544.33315	0.86	1.92
Pseudomonas aeruginosa 4	5_0	1.34	1248.289851	279.7790728	33566.204	0.92	1.92
Pseudomonas aeruginosa 4	5_0	1.22	1604.271899	313.2465066	31798.22442	0.86	1.92
Pseudomonas aeruginosa 4	6_0	0.72	6724.619683	368.7834739	37135.62472	0.59	1.92
Pseudomonas aeruginosa 4	6_0	0.81	2876.044671	179.3279697	19841.25021	0.64	1.92
Pseudomonas aeruginosa 4	6_0	0.79	3877.34624	311.490682	25797.99488	0.63	1.92
Pseudomonas aeruginosa 4	6_0	0.82	5765.05849	534.7277887	41483.99355	0.65	1.92
Pseudomonas aeruginosa 4	7_0	0.44	8481.408713	182.0501359	23859.45577	0.45	1.92
Pseudomonas aeruginosa 4	7_0	0.37	10525.29995	193.2029015	25380.97284	0.41	1.92
Pseudomonas aeruginosa 4	7_0	0.49	6971.829569	231.0326942	22110.44473	0.47	1.92
Pseudomonas aeruginosa 4	7_0	0.72	3115.476148	174.1933432	17254.59132	0.59	1.92
Pseudomonas aeruginosa 4	DPA_2_5	-0.34	51467.59137	35873.66438	39962.26312	0.04	1.92
Pseudomonas aeruginosa 4	DPA_2_5	-0.41	43693.93919	21059.25022	25390.93827	0.01	1.92
Pseudomonas aeruginosa 4	DPA_2_5	-0.35	48817.69754	23530.55235	32126.76353	0.04	1.92
Pseudomonas aeruginosa 4	DPA_2_5	-0.33	48642.67128	21077.26722	32835.92499	0.05	1.92
Pseudomonas aeruginosa 4	DPA_3_0	-0.28	46465.05663	18590.41479	33986.01661	0.07	1.92
Pseudomonas aeruginosa 4	DPA_3_0	-0.27	49821.78138	24819.82703	40221.96783	0.08	1.92
Pseudomonas aeruginosa 4	DPA_3_0	-0.23	46039.00583	27608.0068	43463.84633	0.1	1.92
Pseudomonas aeruginosa 4	DPA_3_0	-0.27	45838.39931	18434.13594	34798.64622	0.08	1.92
Pseudomonas aeruginosa 4	DPA_3_5	-0.23	48079.49519	16245.85064	38026.26633	0.1	1.92
Pseudomonas aeruginosa 4	DPA_3_5	-0.18	40412.2903	15864.77095	36965.26642	0.12	1.92
Pseudomonas aeruginosa 4	DPA_3_5	-0.21	45791.61971	12362.43699	35967.33051	0.11	1.92
Pseudomonas aeruginosa 4	DPA_3_5	-0.21	37483.30714	15341.23686	32525.43587	0.11	1.92
Pseudomonas aeruginosa 4	DPA_4_0	-0.21	41262.3547	12052.61893	32584.494	0.11	1.92
Pseudomonas aeruginosa 4	DPA_4_0	-0.17	41563.0457	12754.42074	37013.84368	0.13	1.92
Pseudomonas aeruginosa 4	DPA_4_0	-0.3	43062.29562	14578.3889	28827.71857	0.06	1.92
Pseudomonas aeruginosa 4	DPA_4_0	-0.19	45548.30821	14992.90613	39214.85478	0.12	1.92
Pseudomonas aeruginosa 4	DPA_5_0	-0.24	46443.25698	17600.76673	36619.28658	0.09	1.92
Pseudomonas aeruginosa 4	DPA_5_0	-0.25	47550.29598	14353.14251	35203.38942	0.09	1.92
Pseudomonas aeruginosa 4	DPA_5_0	-0.29	52500.00381	23957.72077	39307.32026	0.07	1.92
Pseudomonas aeruginosa 4	DPA_5_0	-0.24	50176.33118	14854.92398	37258.96991	0.09	1.92
Pseudomonas aeruginosa 4	DPA_6_0	-0.26	48042.36458	18207.89623	36239.77619	0.08	1.92
Pseudomonas aeruginosa 4	DPA_6_0	-0.23	47991.90241	11303.55249	34829.74312	0.1	1.92
Pseudomonas aeruginosa 4	DPA_6_0	-0.32	46237.30174	16111.10979	29509.18105	0.05	1.92
Pseudomonas aeruginosa 4	DPA_6_0	-0.3	46956.4177	14562.78404	30507.81365	0.06	1.92
Pseudomonas aeruginosa 4	DPA_7_0	-0.2	39987.9919	5947.524887	28861.70538	0.11	1.92
Pseudomonas aeruginosa 4	DPA_7_0	-0.19	34937.75512	3858.59249	24856.13782	0.12	1.92
Pseudomonas aeruginosa 4	DPA_7_0	-0.05	38544.3404	3761.736554	37422.32122	0.19	1.92
Pseudomonas aeruginosa 4	DPA_7_0	-0.08	26089.51714	2375.415925	23601.88069	0.18	1.92
Pseudomonas aeruginosa 4	EDTA_2_5	-0.38	39571.53902	46223.65081	36091.28831	0.02	1.92
Pseudomonas aeruginosa 4	EDTA_2_5	-0.47	45104.93017	41480.23373	29114.79868	-0.03	1.92
Pseudomonas aeruginosa 4	EDTA_2_5	-0.35	37331.77208	46517.79978	37489.60557	0.04	1.92
Pseudomonas aeruginosa 4	EDTA_2_5	-0.38	34472.1576	40734.29658	31530.5334	0.02	1.92
Pseudomonas aeruginosa 4	EDTA_3_0	-0.35	33413.16277	41247.66252	33346.12388	0.04	1.92
Pseudomonas aeruginosa 4	EDTA_3_0	-0.4	31508.54305	37194.30367	27429.27298	0.01	1.92
Pseudomonas aeruginosa 4	EDTA_3_0	-0.4	42119.74291	41959.98147	33850.39878	0.01	1.92
Pseudomonas aeruginosa 4	EDTA_3_0	-0.49	37680.16972	30595.7016	21969.48384	-0.04	1.92
Pseudomonas aeruginosa 4	EDTA_3_5	-0.32	44149.03131	40738.43732	40963.43392	0.05	1.92
Pseudomonas aeruginosa 4	EDTA_3_5	-0.3	38270.46314	36966.58512	37415.53112	0.06	1.92
Pseudomonas aeruginosa 4	EDTA_3_5	-0.35	32403.02457	30349.77506	28137.53455	0.04	1.92
Pseudomonas aeruginosa 4	EDTA_3_5	-0.34	25086.47472	25058.14385	23106.67426	0.04	1.92
Pseudomonas aeruginosa 4	EDTA_4_0	-0.34	37711.2759	40723.24371	35735.47569	0.04	1.92
Pseudomonas aeruginosa 4	EDTA_4_0	-0.33	23471.62508	22954.12152	21705.73073	0.05	1.92
Pseudomonas aeruginosa 4	EDTA_4_0	-0.33	37627.03415	38471.24729	35441.03665	0.05	1.92
Pseudomonas aeruginosa 4	EDTA_4_0	-0.31	31163.94193	24982.42325	27507.50029	0.06	1.92
Pseudomonas aeruginosa 4	EDTA_5_0	-0.21	24394.03013	23556.18511	29326.92557	0.11	1.92
Pseudomonas aeruginosa 4	EDTA_5_0	-0.3	33772.5553	30861.54455	32479.92276	0.06	1.92
Pseudomonas aeruginosa 4	EDTA_5_0	-0.18	31369.80177	22363.94967	35200.41483	0.12	1.92
Pseudomonas aeruginosa 4	EDTA_5_0	-0.12	19818.4537	16101.00192	27119.20416	0.16	1.92
Pseudomonas aeruginosa 4	EDTA_6_0	1.01	2370.316625	131.4538574	25472.13268	0.74	1.92
Pseudomonas aeruginosa 4	EDTA_6_0	0.97	2472.145661	200.2618389	24936.38341	0.72	1.92
Pseudomonas aeruginosa 4	EDTA_6_0	1.09	2182.501216	248.0766015	29568.50479	0.78	1.92
Pseudomonas aeruginosa 4	EDTA_6_0	1.1	1460.654552	155.0043878	20387.06066	0.79	1.92
Pseudomonas aeruginosa 4	EDTA_7_0	0.42	9700.2198	209.4764128	26014.38862	0.44	1.92
Pseudomonas aeruginosa 4	EDTA_7_0	0.46	7449.618257	182.8989533	22125.1191	0.46	1.92
Pseudomonas aeruginosa 4	EDTA_7_0	0.84	1757.662495	100.485995	12794.80565	0.66	1.92
Pseudomonas aeruginosa 4	EDTA_7_0	0.69	3230.40229	159.7000565	16772.69268	0.58	1.92
negative control	N	-0.46	30688.95128	18664.96738	17030.99357	-0.02	1.92
negative control	N	-0.42	26673.55666	10241.82548	14040.59449	0	1.92
negative control	N	-0.65	33584.58793	10483.81796	9825.415135	-0.12	1.92
negative control	N	-0.49	25187.8146	9555.198276	11211.47984	-0.04	1.92
positive control	P	1.51	277.779014	102.65625	12354.01625	1.01	1.92
positive control	P	1.5	524.823541	99.16766031	19611.86834	1	1.92
positive control	P	1.54	349.9320364	124.8853904	16419.89243	1.02	1.92
positive control	P	1.55	277.4078797	116.9829364	14124.62429	1.03	1.92
Pseudomonas aeruginosa 5	1_0	-0.17	12472.80399	25053.37971	25396.12462	0.03	1.73
Pseudomonas aeruginosa 5	1_0	-0.16	21736.04595	33564.66867	37988.8627	0.04	1.73
Pseudomonas aeruginosa 5	1_0	-0.17	19963.44792	31494.55692	34524.91945	0.03	1.73
Pseudomonas aeruginosa 5	1_0	-0.17	7413.449405	15291.43303	15187.03765	0.03	1.73
Pseudomonas aeruginosa 5	1_5	0.61	5193.164631	3954.521304	36964.91395	0.48	1.73
Pseudomonas aeruginosa 5	1_5	0.52	3104.168253	3448.589428	21519.71009	0.43	1.73
Pseudomonas aeruginosa 5	1_5	0.72	3396.071739	2353.858183	30351.86364	0.55	1.73
Pseudomonas aeruginosa 5	1_5	0.59	3360.9137	5517.090539	34359.10951	0.47	1.73
Pseudomonas aeruginosa 5	2_0	1.48	778.9761534	227.8627657	30242.29938	0.98	1.73
Pseudomonas aeruginosa 5	2_0	1.29	1240.182371	529.7277939	34483.54923	0.87	1.73
Pseudomonas aeruginosa 5	2_0	1.39	983.0287913	333.4479377	32275.91209	0.93	1.73
Pseudomonas aeruginosa 5	2_0	1.43	610.0208334	256.34375	23370.6208	0.96	1.73
Pseudomonas aeruginosa 5	2_5	1.3	1575.737667	348.1605323	38353.67429	0.88	1.73
Pseudomonas aeruginosa 5	2_5	1.4	1423.094954	389.2067086	45938.29497	0.94	1.73
Pseudomonas aeruginosa 5	2_5	1.46	804.9089092	268.3360078	31034.16355	0.97	1.73
Pseudomonas aeruginosa 5	2_5	1.39	973.1101132	269.4070433	30191.26849	0.93	1.73
Pseudomonas aeruginosa 5	3_0	1.35	1004.648019	363.4572355	30584.84065	0.91	1.73
Pseudomonas aeruginosa 5	3_0	1.47	907.873138	351.2252066	37208.96039	0.98	1.73
Pseudomonas aeruginosa 5	3_0	1.42	777.5711222	232.8996675	26517.61242	0.95	1.73
Pseudomonas aeruginosa 5	3_0	1.48	756.2026561	357.9852546	33351.8106	0.98	1.73
Pseudomonas aeruginosa 5	3_5	1.36	1158.370007	260.4821713	32728.36971	0.92	1.73
Pseudomonas aeruginosa 5	3_5	1.37	834.4436415	245.8328152	25457.7944	0.92	1.73
Pseudomonas aeruginosa 5	3_5	1.46	1078.20927	379.2975187	42215.69842	0.97	1.73
Pseudomonas aeruginosa 5	3_5	1.48	928.7050397	351.4584207	38917.59005	0.99	1.73
Pseudomonas aeruginosa 5	4_0	1.53	586.456924	212.6938423	26852.04245	1.01	1.73
Pseudomonas aeruginosa 5	4_0	1.38	625.4762155	193.3959846	19761.69687	0.93	1.73
Pseudomonas aeruginosa 5	4_0	1.44	1036.100104	394.9774727	39048.02661	0.96	1.73
Pseudomonas aeruginosa 5	4_0	1.38	1154.246366	270.9556125	34251.6923	0.93	1.73
Pseudomonas aeruginosa 5	5_0	1.66	373.5141438	137.9976485	23346.27789	1.09	1.73
Pseudomonas aeruginosa 5	5_0	1.41	861.69115	236.0416331	28145.31564	0.94	1.73
Pseudomonas aeruginosa 5	5_0	1.49	758.3293374	165.8124727	28363.98443	0.99	1.73
Pseudomonas aeruginosa 5	5_0	1.53	579.644712	191.5919503	26050.53911	1.01	1.73
Pseudomonas aeruginosa 5	6_0	1.25	982.0884412	177.9337001	20855.60633	0.85	1.73
Pseudomonas aeruginosa 5	6_0	1.32	1028.999716	180.5846573	25348.21547	0.89	1.73
Pseudomonas aeruginosa 5	6_0	1.24	1199.668725	178.7894569	24121.65723	0.85	1.73
Pseudomonas aeruginosa 5	6_0	1.27	1259.984733	167.8115066	26845.6587	0.86	1.73
Pseudomonas aeruginosa 5	7_0	0.86	3437.802145	260.909382	26985.28147	0.63	1.73
Pseudomonas aeruginosa 5	7_0	1.08	2025.751249	220.5642024	27197.0323	0.75	1.73
Pseudomonas aeruginosa 5	7_0	0.89	2238.23746	130.8978265	18579.22554	0.65	1.73
Pseudomonas aeruginosa 5	7_0	0.87	2065.53689	117.1675009	16096.72927	0.63	1.73
Pseudomonas aeruginosa 5	DPA_1_0	-0.3	44114.92695	17586.07778	30822.94075	-0.04	1.73
Pseudomonas aeruginosa 5	DPA_1_0	-0.35	40286.26887	17969.56033	26265.52976	-0.07	1.73
Pseudomonas aeruginosa 5	DPA_1_0	-0.26	41854.05481	17547.30244	32687.97193	-0.02	1.73
Pseudomonas aeruginosa 5	DPA_1_0	-0.31	44688.47278	20465.3098	31599.21229	-0.05	1.73
Pseudomonas aeruginosa 5	DPA_1_5	-0.28	46949.4881	21822.00907	36096.46807	-0.03	1.73
Pseudomonas aeruginosa 5	DPA_1_5	-0.31	34093.41049	11757.9368	22461.42896	-0.05	1.73
Pseudomonas aeruginosa 5	DPA_1_5	-0.27	41321.93341	13550.90508	29417.02488	-0.03	1.73
Pseudomonas aeruginosa 5	DPA_1_5	-0.23	45371.46966	22678.52178	40528.62933	0	1.73
Pseudomonas aeruginosa 5	DPA_2_0	-0.23	46088.51893	16020.12353	36435.67922	0	1.73
Pseudomonas aeruginosa 5	DPA_2_0	-0.25	42975.25618	12036.40012	31036.74103	-0.01	1.73
Pseudomonas aeruginosa 5	DPA_2_0	-0.2	32691.9373	10387.91934	27029.12035	0.01	1.73
Pseudomonas aeruginosa 5	DPA_2_0	-0.25	36974.41196	9982.608536	26528.24361	-0.01	1.73
Pseudomonas aeruginosa 5	DPA_2_5	-0.31	47477.28791	24860.31279	35435.19824	-0.05	1.73
Pseudomonas aeruginosa 5	DPA_2_5	-0.37	41841.35388	11333.55746	22453.07729	-0.09	1.73
Pseudomonas aeruginosa 5	DPA_2_5	-0.26	48423.34451	28765.39424	42804.36043	-0.02	1.73
Pseudomonas aeruginosa 5	DPA_2_5	-0.32	41479.29008	15049.43841	27161.08192	-0.05	1.73
Pseudomonas aeruginosa 5	DPA_3_0	-0.41	51789.756	27259.65322	30561.42371	-0.11	1.73
Pseudomonas aeruginosa 5	DPA_3_0	-0.31	58549.46279	32281.33617	44141.84988	-0.05	1.73
Pseudomonas aeruginosa 5	DPA_3_0	-0.38	55341.05575	29655.53162	35386.20722	-0.09	1.73
Pseudomonas aeruginosa 5	DPA_3_0	-0.39	52403.00006	23997.77994	31464.0644	-0.09	1.73
Pseudomonas aeruginosa 5	DPA_3_5	-0.39	49658.00446	37375.39724	35837.8138	-0.09	1.73
Pseudomonas aeruginosa 5	DPA_3_5	-0.37	54091.89667	34900.565	37997.3489	-0.08	1.73
Pseudomonas aeruginosa 5	DPA_3_5	-0.39	49797.2485	31714.07039	33055.18956	-0.1	1.73
Pseudomonas aeruginosa 5	DPA_3_5	-0.47	51923.36169	32535.82409	28851.49604	-0.14	1.73
Pseudomonas aeruginosa 5	DPA_4_0	-0.38	42780.71011	29644.96219	30076.04039	-0.09	1.73
Pseudomonas aeruginosa 5	DPA_4_0	-0.5	51929.06361	33569.17572	27245.68473	-0.16	1.73
Pseudomonas aeruginosa 5	DPA_4_0	-0.43	49428.51237	28550.92556	28772.98684	-0.12	1.73
Pseudomonas aeruginosa 5	DPA_4_0	-0.34	51829.21762	42361.87126	43021.29764	-0.07	1.73
Pseudomonas aeruginosa 5	DPA_5_0	-0.15	45476.49695	10116.44412	39601.25332	0.04	1.73
Pseudomonas aeruginosa 5	DPA_5_0	-0.19	37588.77634	8365.567252	29706.51642	0.02	1.73
Pseudomonas aeruginosa 5	DPA_5_0	-0.23	42734.94328	9612.81544	31006.77379	0	1.73
Pseudomonas aeruginosa 5	DPA_5_0	-0.19	42795.98305	9950.071323	33702.98931	0.02	1.73
Pseudomonas aeruginosa 5	DPA_6_0	-0.19	38363.81346	8966.222163	30745.10019	0.02	1.73
Pseudomonas aeruginosa 5	DPA_6_0	-0.23	29076.09807	7416.342455	21492.59018	0	1.73
Pseudomonas aeruginosa 5	DPA_6_0	-0.29	44521.9561	10744.40781	28598.1688	-0.04	1.73
Pseudomonas aeruginosa 5	DPA_6_0	-0.26	55490.41479	14317.14971	38326.68637	-0.02	1.73
Pseudomonas aeruginosa 5	DPA_7_0	-0.11	27991.68948	6120.99057	26758.58216	0.07	1.73
Pseudomonas aeruginosa 5	DPA_7_0	-0.13	42074.30706	8596.261465	37903.52815	0.06	1.73
Pseudomonas aeruginosa 5	DPA_7_0	-0.09	35472.66998	6448.378778	34220.54791	0.08	1.73
Pseudomonas aeruginosa 5	DPA_7_0	-0.2	41788.36849	8931.754517	32308.6779	0.02	1.73
Pseudomonas aeruginosa 5	EDTA_1_0	-0.25	34652.84178	25807.12422	34349.36399	-0.01	1.73
Pseudomonas aeruginosa 5	EDTA_1_0	-0.19	21927.71067	26449.95673	31063.38879	0.02	1.73
Pseudomonas aeruginosa 5	EDTA_1_0	-0.25	32607.32759	28826.9921	34380.86152	-0.02	1.73
Pseudomonas aeruginosa 5	EDTA_1_0	-0.24	30569.64462	28951.60423	34165.88509	-0.01	1.73
Pseudomonas aeruginosa 5	EDTA_1_5	0.8	3020.158439	2737.053471	36164.04345	0.59	1.73
Pseudomonas aeruginosa 5	EDTA_1_5	0.68	3264.965447	3544.333572	32945.28738	0.52	1.73
Pseudomonas aeruginosa 5	EDTA_1_5	0.98	2241.918655	1596.820029	36965.14231	0.7	1.73
Pseudomonas aeruginosa 5	EDTA_1_5	0.79	2263.86253	2306.5	28495.97396	0.59	1.73
Pseudomonas aeruginosa 5	EDTA_2_0	1.4	1012.786249	340.6672152	34360.95291	0.94	1.73
Pseudomonas aeruginosa 5	EDTA_2_0	1.38	1030.190187	251.2293233	30879.54161	0.93	1.73
Pseudomonas aeruginosa 5	EDTA_2_0	1.41	720.473534	179.6194086	23070.63259	0.94	1.73
Pseudomonas aeruginosa 5	EDTA_2_0	1.46	1063.65484	305.1933214	39173.14722	0.97	1.73
Pseudomonas aeruginosa 5	EDTA_2_5	1.44	1161.156112	322.5913943	40572.64394	0.96	1.73
Pseudomonas aeruginosa 5	EDTA_2_5	1.43	1002.019646	307.9609743	35003.79902	0.95	1.73
Pseudomonas aeruginosa 5	EDTA_2_5	1.31	849.7094607	224.867668	21709.61218	0.88	1.73
Pseudomonas aeruginosa 5	EDTA_2_5	1.45	873.1082899	177.0864961	29380.71682	0.96	1.73
Pseudomonas aeruginosa 5	EDTA_3_0	1.47	1088.867051	144.8865261	36389.85216	0.98	1.73
Pseudomonas aeruginosa 5	EDTA_3_0	1.44	1135.155616	272.6966261	38930.19324	0.96	1.73
Pseudomonas aeruginosa 5	EDTA_3_0	1.45	1077.03748	279.20127	38339.77187	0.97	1.73
Pseudomonas aeruginosa 5	EDTA_3_0	1.46	980.428455	228.75	34929.55282	0.97	1.73
Pseudomonas aeruginosa 5	EDTA_3_5	1.42	929.5704477	203.8593267	29699.40721	0.95	1.73
Pseudomonas aeruginosa 5	EDTA_3_5	1.48	828.5472088	214.9183814	31728.13282	0.99	1.73
Pseudomonas aeruginosa 5	EDTA_3_5	1.45	714.3477283	208.5326899	25752.05328	0.96	1.73
Pseudomonas aeruginosa 5	EDTA_3_5	1.4	1105.873504	252.5172487	34148.14881	0.94	1.73
Pseudomonas aeruginosa 5	EDTA_4_0	1.38	885.6509327	227.4250495	26716.52665	0.93	1.73
Pseudomonas aeruginosa 5	EDTA_4_0	1.34	1157.64148	244.4998361	30797.62269	0.9	1.73
Pseudomonas aeruginosa 5	EDTA_4_0	1.44	1167.556835	233.051574	38250.66937	0.96	1.73
Pseudomonas aeruginosa 5	EDTA_4_0	1.42	983.1096326	284.9189201	33716.4235	0.95	1.73
Pseudomonas aeruginosa 5	EDTA_5_0	1.23	1348.336543	157.6782529	25345.24784	0.84	1.73
Pseudomonas aeruginosa 5	EDTA_5_0	1.33	1457.424472	246.4204392	36413.76477	0.9	1.73
Pseudomonas aeruginosa 5	EDTA_5_0	1.25	1224.050143	210.2911084	25699.98196	0.85	1.73
Pseudomonas aeruginosa 5	EDTA_5_0	1.36	1070.467585	261.8832402	30281.80551	0.91	1.73
Pseudomonas aeruginosa 5	EDTA_6_0	1.15	2164.902436	214.8625525	33949.44319	0.8	1.73
Pseudomonas aeruginosa 5	EDTA_6_0	1.28	795.7169133	114.3522427	17535.51774	0.87	1.73
Pseudomonas aeruginosa 5	EDTA_6_0	1.11	1958.285689	155.2824582	27452.73614	0.77	1.73
Pseudomonas aeruginosa 5	EDTA_6_0	1.22	1605.110565	224.3582872	30689.89271	0.84	1.73
Pseudomonas aeruginosa 5	EDTA_7_0	0.79	2999.712568	156.3788511	19307.94145	0.58	1.73
Pseudomonas aeruginosa 5	EDTA_7_0	0.79	4577.396074	182.246141	29411.63547	0.59	1.73
Pseudomonas aeruginosa 5	EDTA_7_0	0.96	2181.884278	175.3579564	21322.75217	0.68	1.73
Pseudomonas aeruginosa 5	EDTA_7_0	0.95	2408.324495	87.10757836	22133.27677	0.68	1.73
negative control	N	-0.26	21302.93999	12707.51902	18754.28932	-0.02	1.73
negative control	N	-0.41	28053.0144	11046.26735	15317.28181	-0.11	1.73
negative control	N	-0.33	21702.04412	12192.28366	15759.24789	-0.06	1.73
negative control	N	-0.22	10190.79845	4562.771622	8801.576617	0	1.73
positive control	P	1.51	1009.235776	130.8381882	36773.13932	1	1.73
positive control	P	1.64	308.3834308	110.1981145	18179.93615	1.07	1.73
positive control	P	1.61	380.1412725	129.6105652	20934.65011	1.06	1.73
positive control	P	1.76	271.5598032	105.7398077	21893.83209	1.15	1.73
Klebsiella pneumoniae 6	1_0	1.46	755.897095	222.8862531	28089.2244	0.91	1.76
Klebsiella pneumoniae 6	1_0	1.37	930.6792662	533.5361242	34368.69717	0.86	1.76
Klebsiella pneumoniae 6	1_0	1.29	927.9999505	412.3904036	26063.32217	0.82	1.76
Klebsiella pneumoniae 6	1_0	1.5	642.1231581	223.7612089	27644.83854	0.94	1.76
Klebsiella pneumoniae 6	1_5	1.37	1122.624486	413.6896332	35786.95066	0.86	1.76
Klebsiella pneumoniae 6	1_5	1.32	1234.388607	547.9106825	37450.00337	0.83	1.76
Klebsiella pneumoniae 6	1_5	1.47	688.4539123	199.2973309	26446.87212	0.92	1.76
Klebsiella pneumoniae 6	1_5	1.41	767.9529502	223.6877056	25241.37347	0.88	1.76
Klebsiella pneumoniae 6	2_0	1.39	1006.74287	434.8439734	35450.28321	0.87	1.76
Klebsiella pneumoniae 6	2_0	1.34	864.436761	273.8742978	24812.41773	0.84	1.76
Klebsiella pneumoniae 6	2_0	1.36	1402.629748	437.5630204	41827.93889	0.85	1.76
Klebsiella pneumoniae 6	2_0	1.31	1198.342642	327.7149703	31455.11027	0.83	1.76
Klebsiella pneumoniae 6	2_5	1.27	1247.795226	289.2620386	28403.78019	0.8	1.76
Klebsiella pneumoniae 6	2_5	1.42	944.7614345	236.5664126	31197.96916	0.89	1.76
Klebsiella pneumoniae 6	2_5	1.46	698.8365961	383.7835214	31276.80752	0.91	1.76
Klebsiella pneumoniae 6	2_5	1.38	786.7963384	409.3442039	28648.82935	0.87	1.76
Klebsiella pneumoniae 6	3_0	1.6	467.0287787	195.7012918	26630.35385	0.99	1.76
Klebsiella pneumoniae 6	3_0	1.57	458.0329317	174.2458283	23758.27286	0.98	1.76
Klebsiella pneumoniae 6	3_0	1.5	440.6462834	210.792229	20568.54566	0.93	1.76
Klebsiella pneumoniae 6	3_0	1.57	596.8959911	233.8231718	30939.32031	0.98	1.76
Klebsiella pneumoniae 6	3_5	1.42	720.9193364	155.9603765	22969.55288	0.89	1.76
Klebsiella pneumoniae 6	3_5	1.48	903.0856113	231.2821082	34450.78753	0.93	1.76
Klebsiella pneumoniae 6	3_5	1.49	798.7348995	251.325744	32353.11893	0.93	1.76
Klebsiella pneumoniae 6	3_5	1.44	1038.722239	302.7001453	36994.54329	0.9	1.76
Klebsiella pneumoniae 6	4_0	1.7	256.9822099	105.9811742	18184.54798	1.05	1.76
Klebsiella pneumoniae 6	4_0	1.64	392.1133652	210.7928642	26435.51076	1.02	1.76
Klebsiella pneumoniae 6	4_0	1.68	382.4567567	129.9934405	24685.04324	1.04	1.76
Klebsiella pneumoniae 6	4_0	1.75	341.2952719	132.3603872	26746.09832	1.08	1.76
Klebsiella pneumoniae 6	5_0	1.54	493.8247357	211.1883132	24532.03196	0.96	1.76
Klebsiella pneumoniae 6	5_0	1.53	563.14702	202.5433297	25935.59928	0.95	1.76
Klebsiella pneumoniae 6	5_0	1.68	454.5642106	137.4690645	28184.0855	1.04	1.76
Klebsiella pneumoniae 6	5_0	1.51	795.9767144	296.4452903	35290.05759	0.94	1.76
Klebsiella pneumoniae 6	6_0	1.66	322.0416665	121.5270972	20375.23422	1.03	1.76
Klebsiella pneumoniae 6	6_0	1.58	326.6225175	93.71002638	16072.96643	0.98	1.76
Klebsiella pneumoniae 6	6_0	1.65	402.544505	176.8764488	25833.58737	1.02	1.76
Klebsiella pneumoniae 6	6_0	1.74	215.7355975	140.5281733	19578.12089	1.07	1.76
Klebsiella pneumoniae 6	DPA_1_0	-0.31	48516.80447	21633.74878	34716.53431	-0.09	1.76
Klebsiella pneumoniae 6	DPA_1_0	-0.31	45566.01356	18836.57866	31336.64278	-0.1	1.76
Klebsiella pneumoniae 6	DPA_1_0	-0.18	20994.85838	19537.9605	26917.53914	-0.02	1.76
Klebsiella pneumoniae 6	DPA_1_0	-0.29	22721.43621	10448.4924	17073.0958	-0.08	1.76
Klebsiella pneumoniae 6	DPA_1_5	-0.22	19490.14179	9933.527153	17830.52447	-0.04	1.76
Klebsiella pneumoniae 6	DPA_1_5	-0.2	29648.1154	18108.15077	30279.51558	-0.03	1.76
Klebsiella pneumoniae 6	DPA_1_5	-0.24	40369.0813	29488.28813	40116.75533	-0.05	1.76
Klebsiella pneumoniae 6	DPA_1_5	-0.26	24023.62562	13773.68282	20561.25509	-0.07	1.76
Klebsiella pneumoniae 6	DPA_2_0	-0.36	41490.97855	23725.5568	28446.62878	-0.12	1.76
Klebsiella pneumoniae 6	DPA_2_0	-0.35	44692.53559	30675.94557	33965.45451	-0.11	1.76
Klebsiella pneumoniae 6	DPA_2_0	-0.32	33095.1624	12071.64577	21635.48178	-0.1	1.76
Klebsiella pneumoniae 6	DPA_2_0	-0.39	37498.52664	20975.7899	23658.3644	-0.14	1.76
Klebsiella pneumoniae 6	DPA_2_5	-0.26	27078.27378	13031.92051	22256.70929	-0.06	1.76
Klebsiella pneumoniae 6	DPA_2_5	-0.27	34503.67873	13477.92339	25483.61431	-0.07	1.76
Klebsiella pneumoniae 6	DPA_2_5	-0.3	34670.33032	17174.39558	25978.53656	-0.09	1.76
Klebsiella pneumoniae 6	DPA_2_5	-0.31	28454.11943	13793.10782	20515.88881	-0.1	1.76
Klebsiella pneumoniae 6	DPA_3_0	-0.46	45304.96617	23294.25929	23831.61748	-0.18	1.76
Klebsiella pneumoniae 6	DPA_3_0	-0.45	41802.11642	12136.57871	19355.02158	-0.17	1.76
Klebsiella pneumoniae 6	DPA_3_0	-0.32	39575.96255	19301.51686	28363.88328	-0.1	1.76
Klebsiella pneumoniae 6	DPA_3_0	-0.36	47285.27044	21151.90027	29550.59553	-0.13	1.76
Klebsiella pneumoniae 6	DPA_3_5	-0.33	30157.76349	17325.79041	22336.51464	-0.1	1.76
Klebsiella pneumoniae 6	DPA_3_5	-0.34	45677.47816	21531.0273	30632.92273	-0.11	1.76
Klebsiella pneumoniae 6	DPA_3_5	-0.33	37570.36034	18897.13138	26186.96761	-0.11	1.76
Klebsiella pneumoniae 6	DPA_3_5	-0.27	40117.19853	24116.32418	34282.35728	-0.07	1.76
Klebsiella pneumoniae 6	DPA_4_0	-0.44	41063.50037	25233.28697	24158.75056	-0.17	1.76
Klebsiella pneumoniae 6	DPA_4_0	-0.42	43956.16602	22998.2229	25294.06895	-0.16	1.76
Klebsiella pneumoniae 6	DPA_4_0	-0.3	30655.17859	22024.34214	26601.8342	-0.09	1.76
Klebsiella pneumoniae 6	DPA_4_0	-0.32	24945.53644	21640.21267	22295.10772	-0.1	1.76
Klebsiella pneumoniae 6	DPA_5_0	-0.1	26536.89004	6608.457722	26096.66969	0.02	1.76
Klebsiella pneumoniae 6	DPA_5_0	-0.18	21010.39894	5199.262667	17505.81759	-0.02	1.76
Klebsiella pneumoniae 6	DPA_5_0	-0.1	12150.09459	17710.08546	23497.39697	0.02	1.76
Klebsiella pneumoniae 6	DPA_5_0	-0.14	17847.96573	20065.43416	27422.98711	0	1.76
Klebsiella pneumoniae 6	DPA_6_0	0.37	10825.23642	2083.864018	30176.36133	0.29	1.76
Klebsiella pneumoniae 6	DPA_6_0	0.21	11275.45048	1859.783723	21364.44276	0.2	1.76
Klebsiella pneumoniae 6	DPA_6_0	0.22	7763.800409	6522.537786	23757.44556	0.21	1.76
Klebsiella pneumoniae 6	DPA_6_0	0.35	5573.924219	4826.575025	23147.38856	0.28	1.76
Klebsiella pneumoniae 6	DPA_7_0	0.5	6236.114967	959.8318361	22567.25155	0.36	1.76
Klebsiella pneumoniae 6	DPA_7_0	0.56	4880.072644	867.3892967	20842.47593	0.4	1.76
Klebsiella pneumoniae 6	DPA_7_0	0.52	5110.794564	798.2334662	19500.16655	0.38	1.76
Klebsiella pneumoniae 6	DPA_7_0	0.49	6550.668962	1265.349259	24396.46541	0.36	1.76
Klebsiella pneumoniae 6	EDTA_1_0	1.5	785.2828214	169	30010.3072	0.93	1.76
Klebsiella pneumoniae 6	EDTA_1_0	1.4	727.5684949	263.1159927	24745.26588	0.88	1.76
Klebsiella pneumoniae 6	EDTA_1_0	1.46	774.1961984	356.7388759	32509.47536	0.91	1.76
Klebsiella pneumoniae 6	EDTA_1_0	1.47	538.5430853	209.7664608	22191.78229	0.92	1.76
Klebsiella pneumoniae 6	EDTA_1_5	1.51	569.9026258	248.6161477	26314.51523	0.94	1.76
Klebsiella pneumoniae 6	EDTA_1_5	1.55	546.7842035	298.1726165	29825.90711	0.96	1.76
Klebsiella pneumoniae 6	EDTA_1_5	1.65	412.0576769	269.906701	30757.53398	1.02	1.76
Klebsiella pneumoniae 6	EDTA_1_5	1.71	406.4279749	210.8150459	31572.38958	1.05	1.76
Klebsiella pneumoniae 6	EDTA_2_0	1.67	293.0425966	253	25282.59235	1.03	1.76
Klebsiella pneumoniae 6	EDTA_2_0	1.53	568.7330478	302.0324543	29536.67705	0.95	1.76
Klebsiella pneumoniae 6	EDTA_2_0	1.52	517.5650894	255.7025319	25888.60947	0.95	1.76
Klebsiella pneumoniae 6	EDTA_2_0	1.62	351.5194017	126.0129279	19756.80309	1	1.76
Klebsiella pneumoniae 6	EDTA_2_5	1.47	436.9250089	127.0522274	16815.02362	0.92	1.76
Klebsiella pneumoniae 6	EDTA_2_5	1.59	487.3737013	154.9054226	24855.9869	0.99	1.76
Klebsiella pneumoniae 6	EDTA_2_5	1.54	609.985079	264.771518	30028.71254	0.96	1.76
Klebsiella pneumoniae 6	EDTA_2_5	1.56	576.7123972	201.1073565	28243.70033	0.97	1.76
Klebsiella pneumoniae 6	EDTA_3_0	1.52	726.3015817	144.7651812	29147.69628	0.95	1.76
Klebsiella pneumoniae 6	EDTA_3_0	1.48	729.0813684	273.8309951	30614.82259	0.93	1.76
Klebsiella pneumoniae 6	EDTA_3_0	1.5	440.3754109	170.9525491	19531.21772	0.94	1.76
Klebsiella pneumoniae 6	EDTA_3_0	1.48	724.8409741	229.3220037	28540.76234	0.92	1.76
Klebsiella pneumoniae 6	EDTA_4_0	1.58	383.1876709	120.7000781	19138.02529	0.98	1.76
Klebsiella pneumoniae 6	EDTA_4_0	1.7	458.9900018	207.8028608	33235.69222	1.05	1.76
Klebsiella pneumoniae 6	EDTA_4_0	1.55	658.5678497	178.8299089	29894.24011	0.97	1.76
Klebsiella pneumoniae 6	EDTA_4_0	1.56	591.9074662	281.0167379	31944.62006	0.97	1.76
Klebsiella pneumoniae 6	EDTA_5_0	1.65	405.0964613	97.13645624	22616.52854	1.02	1.76
Klebsiella pneumoniae 6	EDTA_5_0	1.64	526.9303611	161.0534566	30236.93808	1.02	1.76
Klebsiella pneumoniae 6	EDTA_5_0	1.66	471.6144511	117.8212348	27012.07986	1.03	1.76
Klebsiella pneumoniae 6	EDTA_5_0	1.76	232.8259071	150.513523	21937.7662	1.08	1.76
Klebsiella pneumoniae 6	EDTA_6_0	1.55	554.8551654	212.5972502	26966.29691	0.96	1.76
Klebsiella pneumoniae 6	EDTA_6_0	1.45	517.6411127	174.5267021	19414.1006	0.91	1.76
Klebsiella pneumoniae 6	EDTA_6_0	1.56	496.7678818	138.6215067	22997.6275	0.97	1.76
Klebsiella pneumoniae 6	EDTA_6_0	1.5	415.9773425	105.7377935	16359.13974	0.93	1.76
Klebsiella pneumoniae 6	EDTA_7_0	1.7	196.8688756	51.8979389	12556.15139	1.05	1.76
Klebsiella pneumoniae 6	EDTA_7_0	1.54	317.1200225	85.38229156	13828.66379	0.96	1.76
Klebsiella pneumoniae 6	EDTA_7_0	1.62	383.6612752	139.1599213	21907.14037	1	1.76
Klebsiella pneumoniae 6	EDTA_7_0	1.33	510.2041402	146.6010172	14156.06548	0.84	1.76
negative control	N	-0.14	10144.9127	12722.29007	16392.8774	0	1.76
negative control	N	-0.18	7938.025822	10375.63419	12013.55671	-0.02	1.76
negative control	N	-0.58	11506.91057	14086.27261	6795.639936	-0.25	1.76
negative control	N	-0.39	26444.68969	26639.62051	21521.70041	-0.14	1.76
positive control	P	1.7	210.641761	58.31014076	13419.13002	1.05	1.76
positive control	P	1.63	238.1816704	113.5429308	14946.77168	1.01	1.76
positive control	P	1.61	346.9508615	147.8830366	20338.96896	1	1.76
positive control	P	1.64	254.987577	74.31590185	14422.26138	1.02	1.76
Escherichia coli 7	1_0	1.4	1021.441235	413.2567223	35657.85749	0.99	1.27
Escherichia coli 7	1_0	1.47	1007.615828	306.2916108	38833.28532	1.05	1.27
Escherichia coli 7	1_0	1.34	1385.553131	496.1934055	41181.12692	0.95	1.27
Escherichia coli 7	1_0	1.29	1262.447585	409.7378857	32940.06041	0.91	1.27
Escherichia coli 7	1_5	1.41	914.6461087	338.9359468	32591.15786	1.01	1.27
Escherichia coli 7	1_5	1.52	388.9580997	169.3072602	18286.00171	1.09	1.27
Escherichia coli 7	1_5	1.46	524.7828304	241.6021032	22140.58779	1.04	1.27
Escherichia coli 7	1_5	1.34	888.7864113	283.5968776	25845.93207	0.95	1.27
Escherichia coli 7	2_0	1.36	1400.468693	298.6884528	38919.61348	0.96	1.27
Escherichia coli 7	2_0	1.4	1293.600541	411.1131348	42837.73427	1	1.27
Escherichia coli 7	2_0	1.36	1226.969531	340.1241457	35592.70977	0.96	1.27
Escherichia coli 7	2_0	1.34	1157.762411	278.9345556	31245.51176	0.95	1.27
Escherichia coli 7	2_5	1.36	1436.100128	385.425289	41633.34895	0.96	1.27
Escherichia coli 7	2_5	1.42	698.3020236	223.2902908	24236.09914	1.01	1.27
Escherichia coli 7	2_5	1.26	1781.07056	314.5839858	37699.03591	0.88	1.27
Escherichia coli 7	2_5	1.29	1568.99099	296.6373371	36256.36655	0.91	1.27
Escherichia coli 7	3_0	1.33	1132.677252	281.7306816	30178.88508	0.94	1.27
Escherichia coli 7	3_0	1.35	1533.065602	349.6448727	42564.85924	0.96	1.27
Escherichia coli 7	3_0	1.49	786.2842388	278.7535624	33270.02481	1.07	1.27
Escherichia coli 7	3_0	1.42	1225.440301	327.0092097	40844.71161	1.01	1.27
Escherichia coli 7	3_5	1.26	1393.865658	291.9224316	31018.47868	0.89	1.27
Escherichia coli 7	3_5	1.46	837.5717324	241.0607192	31089.70951	1.04	1.27
Escherichia coli 7	3_5	1.31	1700.028583	297.4465605	40488.38275	0.92	1.27
Escherichia coli 7	3_5	1.19	1888.244319	285.1306019	33349.5226	0.83	1.27
Escherichia coli 7	4_0	1.55	807.4053642	158.4861793	34612.415	1.12	1.27
Escherichia coli 7	4_0	1.53	635.3039105	165.6410643	27431.15556	1.1	1.27
Escherichia coli 7	4_0	1.48	973.0231648	181.6297858	34749.82747	1.06	1.27
Escherichia coli 7	4_0	1.39	1226.420461	262.63393	36796.95388	0.99	1.27
Escherichia coli 7	5_0	1.38	1321.444948	235.8652472	37783.76816	0.98	1.27
Escherichia coli 7	5_0	1.42	1043.716823	273.772484	34349.6572	1.01	1.27
Escherichia coli 7	5_0	1.52	805.9195644	224.4739226	33892.94904	1.09	1.27
Escherichia coli 7	5_0	1.42	778.1308166	189.6757011	25189.94416	1.01	1.27
Escherichia coli 7	6_0	1.53	791.4990072	148.3421661	32075.45747	1.1	1.27
Escherichia coli 7	6_0	1.46	625.1079359	154.9245398	22581.30955	1.04	1.27
Escherichia coli 7	6_0	1.51	758.8584779	198.5051058	30704.047	1.08	1.27
Escherichia coli 7	6_0	1.49	1002.260862	309.8125	40855.47611	1.07	1.27
Escherichia coli 7	7_0	1.28	1218.040811	181.4609375	26545.21153	0.9	1.27
Escherichia coli 7	7_0	1.5	857.6684767	194.5750216	33566.6214	1.08	1.27
Escherichia coli 7	7_0	1.52	899.7907859	173.0024926	35456.67626	1.09	1.27
Escherichia coli 7	7_0	1.53	788.6942612	186.7905512	32929.69425	1.1	1.27
Escherichia coli 7	DPA_1_0	-0.34	51331.30998	37100.37094	40708.95722	-0.38	1.27
Escherichia coli 7	DPA_1_0	-0.37	48346.49404	27831.72647	32737.7318	-0.4	1.27
Escherichia coli 7	DPA_1_0	-0.45	48596.16721	19622.42253	23959.20614	-0.47	1.27
Escherichia coli 7	DPA_1_0	-0.4	51187.49537	28153.25555	31351.62069	-0.43	1.27
Escherichia coli 7	DPA_1_5	-0.3	53206.6965	25960.71204	39823.79116	-0.35	1.27
Escherichia coli 7	DPA_1_5	-0.32	46855.95189	15168.57821	29965.29722	-0.36	1.27
Escherichia coli 7	DPA_1_5	-0.3	43672.8641	13353.36625	28878.97531	-0.34	1.27
Escherichia coli 7	DPA_1_5	-0.29	44662.78306	17025.43316	31358.03971	-0.34	1.27
Escherichia coli 7	DPA_2_0	-0.18	35745.28001	12032.92051	31523.54059	-0.25	1.27
Escherichia coli 7	DPA_2_0	-0.24	40066.94934	14119.86005	31481.14302	-0.3	1.27
Escherichia coli 7	DPA_2_0	-0.16	45829.03414	18453.38029	44638.60418	-0.24	1.27
Escherichia coli 7	DPA_2_0	-0.17	47082.34597	15984.02504	42319.67851	-0.25	1.27
Escherichia coli 7	DPA_2_5	0.1	23255.5203	6846.313363	37507.54136	-0.03	1.27
Escherichia coli 7	DPA_2_5	0.04	19025.46809	4048.644197	25121.72061	-0.08	1.27
Escherichia coli 7	DPA_2_5	0.04	25751.2093	6626.080488	35852.18332	-0.08	1.27
Escherichia coli 7	DPA_2_5	0.02	32543.77389	6496.999375	40879.45208	-0.09	1.27
Escherichia coli 7	DPA_3_0	-0.05	31710.84529	6644.588398	34398.48985	-0.15	1.27
Escherichia coli 7	DPA_3_0	-0.19	35940.47861	6172.708555	26970.4558	-0.26	1.27
Escherichia coli 7	DPA_3_0	-0.01	18680.41469	1922.682955	20231.47765	-0.12	1.27
Escherichia coli 7	DPA_3_0	0	25557.57952	2533.236205	28358.40017	-0.11	1.27
Escherichia coli 7	DPA_3_5	0.22	18106.44634	4553.910736	37618.32278	0.06	1.27
Escherichia coli 7	DPA_3_5	0.02	27647.31688	3575.118171	32584.13894	-0.1	1.27
Escherichia coli 7	DPA_3_5	0.09	23816.67414	4903.343134	35344.51403	-0.04	1.27
Escherichia coli 7	DPA_3_5	0.18	17225.24036	3995.375351	32267.14665	0.03	1.27
Escherichia coli 7	DPA_4_0	0.19	22840.83473	2699.634914	39298.37848	0.04	1.27
Escherichia coli 7	DPA_4_0	0.46	9477.423211	2072.742698	33328.55379	0.25	1.27
Escherichia coli 7	DPA_4_0	0.39	10517.68307	2481.906276	31684.04208	0.2	1.27
Escherichia coli 7	DPA_4_0	0.44	9701.145173	2137.654941	32456.89647	0.24	1.27
Escherichia coli 7	DPA_5_0	0.97	2912.730052	409.0538224	31009.447	0.66	1.27
Escherichia coli 7	DPA_5_0	1.11	2855.720237	396.1922607	41471.81832	0.76	1.27
Escherichia coli 7	DPA_5_0	1.13	2193.4822	435.5272721	35652.54504	0.78	1.27
Escherichia coli 7	DPA_5_0	0.99	3338.12968	425.2256655	36966.62069	0.67	1.27
Escherichia coli 7	DPA_6_0	1.02	3095.183685	283.549928	35636.74322	0.7	1.27
Escherichia coli 7	DPA_6_0	1.1	2436.313	331.3902498	34820.58341	0.76	1.27
Escherichia coli 7	DPA_6_0	1.15	2426.519424	370.5523695	39230.54738	0.8	1.27
Escherichia coli 7	DPA_6_0	1.06	2716.87135	344.0218897	34956.17093	0.73	1.27
Escherichia coli 7	DPA_7_0	1.19	1180.155478	239.9342433	22048.68313	0.83	1.27
Escherichia coli 7	DPA_7_0	1.13	2475.976503	379.8934091	38855.33865	0.79	1.27
Escherichia coli 7	DPA_7_0	1.18	1820.686018	326.0959809	32646.72548	0.82	1.27
Escherichia coli 7	DPA_7_0	1.18	1637.01358	247.9247728	28391.58144	0.82	1.27
Escherichia coli 7	EDTA_1_0	-0.36	30076.3295	9285.261828	17216.36641	-0.39	1.27
Escherichia coli 7	EDTA_1_0	-0.29	29516.42279	6280.31805	18324.08425	-0.34	1.27
Escherichia coli 7	EDTA_1_0	-0.19	25657.03762	9799.933617	22891.76617	-0.26	1.27
Escherichia coli 7	EDTA_1_0	-0.43	32088.48495	10813.03073	16009.1277	-0.45	1.27
Escherichia coli 7	EDTA_1_5	-0.31	40661.65608	51176.1532	44969.04755	-0.36	1.27
Escherichia coli 7	EDTA_1_5	-0.31	35681.33216	46320.22915	40064.67114	-0.36	1.27
Escherichia coli 7	EDTA_1_5	-0.3	31727.56203	44622.27542	38390.43116	-0.35	1.27
Escherichia coli 7	EDTA_1_5	-0.4	34381.79379	43599.91458	31272.97345	-0.42	1.27
Escherichia coli 7	EDTA_2_0	-0.16	22509.78641	41609.50948	43907.81727	-0.24	1.27
Escherichia coli 7	EDTA_2_0	-0.24	18189.42184	31172.06348	28495.63223	-0.3	1.27
Escherichia coli 7	EDTA_2_0	-0.19	19235.19409	32334.58985	33518.99607	-0.26	1.27
Escherichia coli 7	EDTA_2_0	-0.23	25704.46215	35947.68918	36487.95235	-0.29	1.27
Escherichia coli 7	EDTA_2_5	-0.22	25048.17478	23125.41318	29157.53399	-0.28	1.27
Escherichia coli 7	EDTA_2_5	-0.17	21504.49554	32941.73662	36394.1339	-0.25	1.27
Escherichia coli 7	EDTA_2_5	-0.28	35543.72096	32492.4729	35427.38655	-0.33	1.27
Escherichia coli 7	EDTA_2_5	-0.24	29424.53023	26181.57029	31837.39545	-0.3	1.27
Escherichia coli 7	EDTA_3_0	-0.11	18596.17861	17158.28575	27649.49361	-0.2	1.27
Escherichia coli 7	EDTA_3_0	-0.19	29316.69401	20594.58802	32509.32804	-0.26	1.27
Escherichia coli 7	EDTA_3_0	-0.24	24451.87016	23939.56718	27952.38685	-0.3	1.27
Escherichia coli 7	EDTA_3_0	-0.24	33622.61364	26858.77589	34607.01316	-0.3	1.27
Escherichia coli 7	EDTA_3_5	-0.06	17442.53913	8123.280732	22377.57218	-0.16	1.27
Escherichia coli 7	EDTA_3_5	0.01	20171.89444	11012.66521	32143.93997	-0.1	1.27
Escherichia coli 7	EDTA_3_5	-0.03	12462.92158	10807.4352	21703.38434	-0.13	1.27
Escherichia coli 7	EDTA_3_5	0.02	16361.97311	9163.891019	26610.53642	-0.1	1.27
Escherichia coli 7	EDTA_4_0	0.16	12589.50926	6907.402142	27922.32443	0.01	1.27
Escherichia coli 7	EDTA_4_0	0.07	12565.50495	11324.24296	28301.10551	-0.05	1.27
Escherichia coli 7	EDTA_4_0	0.13	11353.54981	8899.127886	27516.55412	-0.01	1.27
Escherichia coli 7	EDTA_4_0	0.02	12828.17839	8375.056125	22271.46072	-0.09	1.27
Escherichia coli 7	EDTA_5_0	-0.07	32893.28529	6994.121423	33588.79392	-0.17	1.27
Escherichia coli 7	EDTA_5_0	-0.07	32978.0549	7336.657071	33926.54271	-0.17	1.27
Escherichia coli 7	EDTA_5_0	0.03	24711.42233	6726.418806	33693.59259	-0.09	1.27
Escherichia coli 7	EDTA_5_0	-0.02	30476.11633	6290.107434	34985.82967	-0.13	1.27
Escherichia coli 7	EDTA_6_0	0.11	18126.24397	4611.884512	29197.13263	-0.02	1.27
Escherichia coli 7	EDTA_6_0	-0.03	28690.14599	6837.252898	33384.09871	-0.13	1.27
Escherichia coli 7	EDTA_6_0	0.3	10659.64634	3996.496801	28959.46186	0.12	1.27
Escherichia coli 7	EDTA_6_0	0.32	9269.730619	2778.923829	25295.42344	0.14	1.27
Escherichia coli 7	EDTA_7_0	1.34	784.1996938	180.970021	21259.41015	0.95	1.27
Escherichia coli 7	EDTA_7_0	1.34	901.1355225	169.0721085	23489.22808	0.95	1.27
Escherichia coli 7	EDTA_7_0	1.36	919.9364955	230.4595166	26353.08587	0.96	1.27
Escherichia coli 7	EDTA_7_0	1.39	843.896153	153.141377	24552.23587	0.99	1.27
negative control	N	-0.03	13344.47593	3382.375	15590.35833	-0.13	1.27
negative control	N	0.14	9168.064518	2822.300765	16538.83492	0	1.27
negative control	N	-0.24	11793.09275	2672.132577	8398.341277	-0.3	1.27
negative control	N	-0.05	11367.34679	3562.940355	13181.7632	-0.15	1.27
positive control	P	1.41	774.5503726	134.2870092	23104.77553	1	1.27
positive control	P	1.46	643.5135096	138.794921	22371.96796	1.04	1.27
positive control	P	1.54	464.9083113	123.578381	20315.7425	1.1	1.27
positive control	P	1.46	542.1932634	116.6204267	18860.63661	1.04	1.27
Citrobacter freundii 8	1_0	0.23	10537.78639	7990.081564	31620.69157	0.03	1.32
Citrobacter freundii 8	1_0	0.19	13223.47014	12013.37697	39112.02937	0	1.32
Citrobacter freundii 8	1_0	0.27	9384.707143	8085.711997	32679.98903	0.06	1.32
Citrobacter freundii 8	1_0	0.18	13412.08079	16832.73861	45286.95778	-0.01	1.32
Citrobacter freundii 8	1_5	0.82	2912.08623	2563.453578	36158.07905	0.47	1.32
Citrobacter freundii 8	1_5	0.87	1660.448847	2095.997634	28089.80639	0.51	1.32
Citrobacter freundii 8	1_5	0.79	3717.720329	2337.21039	37120.54595	0.45	1.32
Citrobacter freundii 8	1_5	0.74	5151.087767	2232.605686	40848.94971	0.42	1.32
Citrobacter freundii 8	2_0	0.92	1605.158013	1985.156093	29882.67145	0.55	1.32
Citrobacter freundii 8	2_0	0.9	2544.035527	2582.468994	40865.75557	0.54	1.32
Citrobacter freundii 8	2_0	1.02	1778.112514	1885.782302	37964.24764	0.62	1.32
Citrobacter freundii 8	2_0	0.83	3134.628004	3052.722633	42283.21366	0.48	1.32
Citrobacter freundii 8	2_5	1.06	1662.895696	604.6514389	25884.23233	0.65	1.32
Citrobacter freundii 8	2_5	0.94	2381.031073	1153.5	31101.2541	0.57	1.32
Citrobacter freundii 8	2_5	0.97	1865.765859	1379.205168	30351.37023	0.59	1.32
Citrobacter freundii 8	2_5	0.95	2516.202495	1895.249751	39335.19462	0.57	1.32
Citrobacter freundii 8	3_0	1.4	903.9908833	125.9672497	25977.40878	0.91	1.32
Citrobacter freundii 8	3_0	1.34	1636.679574	340.5670908	43058.30439	0.87	1.32
Citrobacter freundii 8	3_0	1.32	1145.665505	331.493915	30671.08639	0.85	1.32
Citrobacter freundii 8	3_0	1.27	1346.396584	330.2266669	31158.89159	0.81	1.32
Citrobacter freundii 8	3_5	1.43	609.6837203	164.7898478	21065.65106	0.94	1.32
Citrobacter freundii 8	3_5	1.43	929.5534441	319.5397486	33781.31256	0.94	1.32
Citrobacter freundii 8	3_5	1.38	1181.042453	364.6989097	37162.16933	0.9	1.32
Citrobacter freundii 8	3_5	1.45	866.0356006	257.4761728	31678.87439	0.95	1.32
Citrobacter freundii 8	4_0	1.47	714.2100923	253.5143163	28630.8025	0.97	1.32
Citrobacter freundii 8	4_0	1.35	1110.158986	319.6680823	32048.58215	0.88	1.32
Citrobacter freundii 8	4_0	1.42	1065.608487	302.8880026	35775.26776	0.93	1.32
Citrobacter freundii 8	4_0	1.61	613.9175687	151.7172462	31296.98992	1.07	1.32
Citrobacter freundii 8	5_0	1.52	637.0279735	165.6316624	26466.89242	1	1.32
Citrobacter freundii 8	5_0	1.4	851.3570712	276.53125	28532.1384	0.92	1.32
Citrobacter freundii 8	5_0	1.52	744.8599562	244.4087656	32503.55964	1	1.32
Citrobacter freundii 8	5_0	1.38	1191.07797	340.8986192	36907.18879	0.9	1.32
Citrobacter freundii 8	6_0	1.49	769.6953293	207.1653006	30354.77659	0.98	1.32
Citrobacter freundii 8	6_0	1.39	1269.124126	214.1805465	36111.49258	0.9	1.32
Citrobacter freundii 8	6_0	1.51	569.7919576	195.3830042	24906.75549	1	1.32
Citrobacter freundii 8	6_0	1.57	563.1174622	156.9370625	26868.76969	1.04	1.32
Citrobacter freundii 8	7_0	1.54	439.8220533	104.9896415	18815.1514	1.02	1.32
Citrobacter freundii 8	7_0	1.53	611.9596483	154.3579694	26121.2542	1.01	1.32
Citrobacter freundii 8	7_0	1.74	392.3022939	131.0735314	29013.08408	1.17	1.32
Citrobacter freundii 8	7_0	1.7	406.0663746	135.8746488	27387.88567	1.14	1.32
Citrobacter freundii 8	DPA_1_0	-0.22	32697.61993	14329.69388	28293.08396	-0.31	1.32
Citrobacter freundii 8	DPA_1_0	-0.24	37575.97914	16714.06835	31546.07425	-0.33	1.32
Citrobacter freundii 8	DPA_1_0	-0.26	42424.42596	12139.06542	29923.46986	-0.34	1.32
Citrobacter freundii 8	DPA_1_0	-0.23	41451.11805	14401.6797	32584.05325	-0.32	1.32
Citrobacter freundii 8	DPA_1_5	-0.25	36436.82767	14386.79815	28839.96989	-0.33	1.32
Citrobacter freundii 8	DPA_1_5	-0.21	41882.84517	13894.36898	34314.69281	-0.31	1.32
Citrobacter freundii 8	DPA_1_5	-0.23	43445.64825	14211.20568	33690.53861	-0.32	1.32
Citrobacter freundii 8	DPA_1_5	-0.2	39692.12328	9409.737293	31069.35558	-0.3	1.32
Citrobacter freundii 8	DPA_2_0	-0.27	54261.55161	19315.88259	39728.83011	-0.35	1.32
Citrobacter freundii 8	DPA_2_0	-0.38	50814.24312	11421.75563	26043.29642	-0.43	1.32
Citrobacter freundii 8	DPA_2_0	-0.44	47818.68185	22351.38077	25193.60435	-0.48	1.32
Citrobacter freundii 8	DPA_2_0	-0.31	43160.46289	22321.75474	31931.32281	-0.38	1.32
Citrobacter freundii 8	DPA_2_5	-0.24	43570.16663	24155.25762	38773.521	-0.33	1.32
Citrobacter freundii 8	DPA_2_5	-0.29	39226.84584	19832.32599	30097.85446	-0.37	1.32
Citrobacter freundii 8	DPA_2_5	-0.29	38085.78711	24188.19368	31712.62799	-0.37	1.32
Citrobacter freundii 8	DPA_2_5	-0.28	42121.93906	28711.47591	37143.78387	-0.36	1.32
Citrobacter freundii 8	DPA_3_0	-0.45	49182.68618	22987.78858	25326.56428	-0.49	1.32
Citrobacter freundii 8	DPA_3_0	-0.32	45008.80557	27578.06502	35075.69161	-0.39	1.32
Citrobacter freundii 8	DPA_3_0	-0.31	54225.58748	19999.39434	36065.76254	-0.38	1.32
Citrobacter freundii 8	DPA_3_0	-0.28	41623.95074	15686.22006	30354.16783	-0.36	1.32
Citrobacter freundii 8	DPA_3_5	-0.35	40687.92159	24630.61446	28903.14033	-0.42	1.32
Citrobacter freundii 8	DPA_3_5	-0.28	37365.62967	17054.32839	28400.73571	-0.36	1.32
Citrobacter freundii 8	DPA_3_5	-0.33	31594.73465	24648.41873	26431.84577	-0.4	1.32
Citrobacter freundii 8	DPA_3_5	-0.33	39251.38439	28196.80153	31650.50111	-0.4	1.32
Citrobacter freundii 8	DPA_4_0	-0.28	48246.89418	14387.55561	32558.71254	-0.36	1.32
Citrobacter freundii 8	DPA_4_0	-0.22	47496.90485	14778.67133	37331.28874	-0.32	1.32
Citrobacter freundii 8	DPA_4_0	-0.26	40555.78777	14508.33883	30512.74306	-0.34	1.32
Citrobacter freundii 8	DPA_4_0	-0.22	43863.63294	15556.68761	35876.46416	-0.31	1.32
Citrobacter freundii 8	DPA_5_0	-0.19	43946.68149	11331.94545	35894.84675	-0.29	1.32
Citrobacter freundii 8	DPA_5_0	-0.27	49875.42992	12743.20884	33806.40093	-0.35	1.32
Citrobacter freundii 8	DPA_5_0	-0.22	48972.97541	14191.17471	37885.99105	-0.32	1.32
Citrobacter freundii 8	DPA_5_0	-0.23	48672.18885	17982.48623	39430.32629	-0.32	1.32
Citrobacter freundii 8	DPA_6_0	0.14	15632.08505	4329.826223	27448.70425	-0.04	1.32
Citrobacter freundii 8	DPA_6_0	0.12	16766.27051	4319.170253	27559.64148	-0.06	1.32
Citrobacter freundii 8	DPA_6_0	0.25	11237.93969	2533.398449	24375.77243	0.04	1.32
Citrobacter freundii 8	DPA_6_0	0.09	20681.46586	5618.246302	32706.10578	-0.08	1.32
Citrobacter freundii 8	DPA_7_0	0.17	17145.64257	5211.708003	33311.84747	-0.02	1.32
Citrobacter freundii 8	DPA_7_0	0.1	22312.84264	6188.459392	36110.62881	-0.07	1.32
Citrobacter freundii 8	DPA_7_0	-0.01	28909.77322	9112.19668	37367.13226	-0.15	1.32
Citrobacter freundii 8	DPA_7_0	0.2	13359.40091	4976.118835	28795.80625	0	1.32
Citrobacter freundii 8	EDTA_1_0	-0.1	18765.87411	26182.64183	36078.84393	-0.22	1.32
Citrobacter freundii 8	EDTA_1_0	-0.19	25466.63421	27662.681	34590.6903	-0.29	1.32
Citrobacter freundii 8	EDTA_1_0	-0.21	15962.82454	26177.8064	25819.16563	-0.31	1.32
Citrobacter freundii 8	EDTA_1_0	-0.16	15515.04156	22818.14146	26816.06684	-0.26	1.32
Citrobacter freundii 8	EDTA_1_5	0.35	9094.155292	7628.519173	37206.98851	0.12	1.32
Citrobacter freundii 8	EDTA_1_5	0.49	4229.658625	5142.628798	28674.92929	0.22	1.32
Citrobacter freundii 8	EDTA_1_5	0.33	6983.267871	8380.604107	32892.41966	0.1	1.32
Citrobacter freundii 8	EDTA_1_5	0.32	7907.060312	5428.074316	27646.01887	0.09	1.32
Citrobacter freundii 8	EDTA_2_0	0.7	2815.614357	4107.454988	34742.48334	0.38	1.32
Citrobacter freundii 8	EDTA_2_0	0.52	5765.222134	6539.763881	40653.99097	0.25	1.32
Citrobacter freundii 8	EDTA_2_0	0.39	8361.263404	5635.428475	34246.44321	0.15	1.32
Citrobacter freundii 8	EDTA_2_0	0.49	4468.576784	4947.6133	29086.0269	0.22	1.32
Citrobacter freundii 8	EDTA_2_5	0.96	2355.471868	1500.777338	35422.51093	0.58	1.32
Citrobacter freundii 8	EDTA_2_5	0.99	1868.499165	960.1339792	27511.29604	0.6	1.32
Citrobacter freundii 8	EDTA_2_5	1.03	1876.546931	1063.620254	31331.56273	0.63	1.32
Citrobacter freundii 8	EDTA_2_5	0.99	1570.778522	1168.363082	26955.31342	0.6	1.32
Citrobacter freundii 8	EDTA_3_0	1.28	1296.883592	504.3735409	34068.88163	0.82	1.32
Citrobacter freundii 8	EDTA_3_0	1.35	1143.307522	295.1750146	32054.66218	0.87	1.32
Citrobacter freundii 8	EDTA_3_0	1.29	1178.798214	341.2931972	29816.71864	0.83	1.32
Citrobacter freundii 8	EDTA_3_0	1.21	1702.558872	435.8046875	34755.59505	0.77	1.32
Citrobacter freundii 8	EDTA_3_5	1.53	769.0383329	224.2689146	33333.57368	1.01	1.32
Citrobacter freundii 8	EDTA_3_5	1.5	768.6776237	281.7558203	33534.72968	0.99	1.32
Citrobacter freundii 8	EDTA_3_5	1.39	915.6162076	318.8160119	30319.7765	0.91	1.32
Citrobacter freundii 8	EDTA_3_5	1.37	932.0280922	293.3769846	28464.53346	0.89	1.32
Citrobacter freundii 8	EDTA_4_0	1.31	1286.378609	292.7206668	32267.76743	0.85	1.32
Citrobacter freundii 8	EDTA_4_0	1.3	1724.437441	438.0595633	42857.56137	0.83	1.32
Citrobacter freundii 8	EDTA_4_0	1.3	964.8982346	259.4410884	24282.46759	0.84	1.32
Citrobacter freundii 8	EDTA_4_0	1.35	1055.74922	266.0561588	29760.66842	0.88	1.32
Citrobacter freundii 8	EDTA_5_0	1.34	913.0682132	232.8839474	25321.39302	0.87	1.32
Citrobacter freundii 8	EDTA_5_0	1.36	901.809717	179.9723539	24955.12969	0.88	1.32
Citrobacter freundii 8	EDTA_5_0	1.45	668.9780361	202.7306908	24388.31266	0.95	1.32
Citrobacter freundii 8	EDTA_5_0	1.34	651.0351088	165.6880457	18038.17815	0.87	1.32
Citrobacter freundii 8	EDTA_6_0	1.39	932.5548138	198.1552518	27959.509	0.91	1.32
Citrobacter freundii 8	EDTA_6_0	1.35	1207.494155	193.0617887	31300.62006	0.87	1.32
Citrobacter freundii 8	EDTA_6_0	1.4	1036.111907	159.9832845	30283.17965	0.92	1.32
Citrobacter freundii 8	EDTA_6_0	1.38	870.9668109	105.8673	23192.17987	0.89	1.32
Citrobacter freundii 8	EDTA_7_0	1.32	1025.968042	217.2693682	25991.56176	0.85	1.32
Citrobacter freundii 8	EDTA_7_0	1.29	518.1419826	114.6779668	12317.90506	0.83	1.32
Citrobacter freundii 8	EDTA_7_0	1.36	1048.598046	193.5816822	28533.92834	0.88	1.32
Citrobacter freundii 8	EDTA_7_0	1.42	650.4768748	78.02042316	19044.57528	0.93	1.32
negative control	N	0	8792.426324	2215.358509	10926.94037	-0.15	1.32
negative control	N	-0.22	15690.6756	3223.961705	11398.27838	-0.31	1.32
negative control	N	0.09	6111.669033	2046.191252	9957.255723	-0.08	1.32
negative control	N	0.19	10284.94204	3367.762492	21352.06887	0	1.32
positive control	P	1.52	495.6557279	145.736285	20998.93715	1	1.32
positive control	P	1.6	368.1101543	216.6853122	23513.33485	1.07	1.32
positive control	P	1.75	244.0536054	116.4277976	20388.70423	1.18	1.32
positive control	P	1.72	177.7387833	64.41126828	12816.18521	1.16	1.32
Citrobacter freundii 9	2_0	-0.13	13834.61438	29107.32719	31650.89214	-0.09	1.51
Citrobacter freundii 9	2_0	-0.11	22589.37874	25587.03035	37383.10097	-0.07	1.51
Citrobacter freundii 9	2_0	-0.15	22310.57388	29606.32095	37176.47245	-0.1	1.51
Citrobacter freundii 9	2_0	-0.04	16856.63697	23874.35311	37179.73827	-0.03	1.51
Citrobacter freundii 9	2_5	-0.11	24307.57777	27327.46907	40383.14223	-0.07	1.51
Citrobacter freundii 9	2_5	-0.14	21753.30515	27026.01331	34959.74448	-0.1	1.51
Citrobacter freundii 9	2_5	-0.04	14661.51631	21479.23104	32871.46085	-0.03	1.51
Citrobacter freundii 9	2_5	0.01	14866.51351	20035.72701	35740.33148	0.01	1.51
Citrobacter freundii 9	3_0	-0.04	17095.90044	18873.67947	33173.84179	-0.02	1.51
Citrobacter freundii 9	3_0	-0.03	15360.20881	20949.62201	33600.49022	-0.02	1.51
Citrobacter freundii 9	3_0	0.03	10140.02374	15541.98698	27803.62215	0.02	1.51
Citrobacter freundii 9	3_0	0.05	12163.98229	17764.09291	33654.64172	0.03	1.51
Citrobacter freundii 9	3_5	0.2	9961.249138	14287.42276	38280.12099	0.13	1.51
Citrobacter freundii 9	3_5	0.26	12044.76338	8437.644788	37272.31153	0.17	1.51
Citrobacter freundii 9	3_5	0.28	8825.91334	11617.29068	39366.77641	0.19	1.51
Citrobacter freundii 9	3_5	0.41	7553.354818	7725.708091	39396.78729	0.27	1.51
Citrobacter freundii 9	4_0	0.22	10398.54494	8325.616654	30820.20446	0.14	1.51
Citrobacter freundii 9	4_0	0.32	5746.584089	9802.900488	32645.19316	0.21	1.51
Citrobacter freundii 9	4_0	0.3	8781.699971	13879.38861	45399.95593	0.2	1.51
Citrobacter freundii 9	4_0	0.35	6061.382037	9283.088882	34461.6553	0.23	1.51
Citrobacter freundii 9	5_0	1.29	881.4119332	439.5781625	25884.76008	0.86	1.51
Citrobacter freundii 9	5_0	1.29	768.8760513	233.7188978	19757.36174	0.86	1.51
Citrobacter freundii 9	5_0	1.11	2009.92225	623.0831362	33808.47072	0.73	1.51
Citrobacter freundii 9	5_0	1.36	982.1387135	257.4460335	28187.17575	0.9	1.51
Citrobacter freundii 9	6_0	1.51	737.8821905	217.5731859	31010.67955	1	1.51
Citrobacter freundii 9	6_0	1.42	987.1595696	280.8159556	33228.62564	0.94	1.51
Citrobacter freundii 9	6_0	1.56	590.3609412	67.63850734	23871.87266	1.03	1.51
Citrobacter freundii 9	6_0	1.43	796.8074462	203.2977701	27121.20844	0.95	1.51
Citrobacter freundii 9	7_0	1.62	465.8008782	138.6701291	25010.63302	1.07	1.51
Citrobacter freundii 9	7_0	1.39	1074.090417	203.1559253	31431.90619	0.92	1.51
Citrobacter freundii 9	7_0	1.43	884.1409618	179.2863275	28882.0055	0.95	1.51
Citrobacter freundii 9	7_0	1.5	514.186161	142.6071236	20613.57852	0.99	1.51
Citrobacter freundii 9	DPA_2_0	-0.29	42747.40621	27834.07772	35796.53317	-0.2	1.51
Citrobacter freundii 9	DPA_2_0	-0.33	42689.18495	23306.69369	30740.31647	-0.22	1.51
Citrobacter freundii 9	DPA_2_0	-0.25	40932.81528	23169.69098	35725.75034	-0.17	1.51
Citrobacter freundii 9	DPA_2_0	-0.26	40296.38137	23436.46746	34770.95162	-0.17	1.51
Citrobacter freundii 9	DPA_2_5	-0.28	38893.18449	14936.95693	28040.95795	-0.19	1.51
Citrobacter freundii 9	DPA_2_5	-0.23	26117.86414	9915.1666	21319.02914	-0.15	1.51
Citrobacter freundii 9	DPA_2_5	-0.22	55000.88854	14565.33078	41482.84101	-0.15	1.51
Citrobacter freundii 9	DPA_2_5	-0.24	49227.18513	10162.98036	34380.61067	-0.16	1.51
Citrobacter freundii 9	DPA_3_0	-0.27	35126.6386	15328.40135	27157.7869	-0.18	1.51
Citrobacter freundii 9	DPA_3_0	-0.24	42024.60827	19810.64045	35569.08999	-0.16	1.51
Citrobacter freundii 9	DPA_3_0	-0.09	28834.90149	13635.72617	34678.27237	-0.06	1.51
Citrobacter freundii 9	DPA_3_0	-0.1	32051.74069	13132.71586	36293.18586	-0.06	1.51
Citrobacter freundii 9	DPA_3_5	-0.32	32048.81952	17052.9096	23520.37219	-0.21	1.51
Citrobacter freundii 9	DPA_3_5	-0.28	29650.06554	9078.990916	20136.3857	-0.19	1.51
Citrobacter freundii 9	DPA_3_5	-0.26	30698.38273	11754.83112	23321.2921	-0.17	1.51
Citrobacter freundii 9	DPA_3_5	-0.33	35429.57856	13113.91228	22563.33057	-0.22	1.51
Citrobacter freundii 9	DPA_4_0	-0.32	48428.9295	39897.42891	42522.17311	-0.21	1.51
Citrobacter freundii 9	DPA_4_0	-0.37	38826.63927	27174.35536	28374.65275	-0.24	1.51
Citrobacter freundii 9	DPA_4_0	-0.29	36907.82294	21356.81901	29841.53018	-0.19	1.51
Citrobacter freundii 9	DPA_4_0	-0.3	29638.06803	20263.5035	25019.47243	-0.2	1.51
Citrobacter freundii 9	DPA_5_0	-0.22	33539.29078	7516.848103	24568.75537	-0.15	1.51
Citrobacter freundii 9	DPA_5_0	-0.18	31527.72453	5746.811835	24585.78405	-0.12	1.51
Citrobacter freundii 9	DPA_5_0	-0.21	41569.64576	10061.88658	32158.49773	-0.14	1.51
Citrobacter freundii 9	DPA_5_0	-0.23	39221.68634	6523.560578	26657.79445	-0.16	1.51
Citrobacter freundii 9	DPA_6_0	-0.35	53408.57974	30591.80947	37197.09628	-0.23	1.51
Citrobacter freundii 9	DPA_6_0	-0.38	39607.74096	13440.04208	21942.78408	-0.25	1.51
Citrobacter freundii 9	DPA_6_0	-0.31	48993.1597	22031.73165	35157.11709	-0.2	1.51
Citrobacter freundii 9	DPA_6_0	-0.41	53865.32462	18334.32933	28354.65344	-0.27	1.51
Citrobacter freundii 9	DPA_7_0	-0.23	39488.9899	10991.77798	29512.53649	-0.15	1.51
Citrobacter freundii 9	DPA_7_0	-0.22	37954.04339	7437.339653	27584.61084	-0.14	1.51
Citrobacter freundii 9	DPA_7_0	-0.23	45215.03207	9000.701767	32186.9544	-0.15	1.51
Citrobacter freundii 9	DPA_7_0	-0.26	26956.38227	4813.724827	17385.21313	-0.17	1.51
Citrobacter freundii 9	EDTA_2_0	-0.36	30855.33746	47538.55656	34225.89408	-0.24	1.51
Citrobacter freundii 9	EDTA_2_0	-0.42	31615.08622	53294.15737	32319.70335	-0.28	1.51
Citrobacter freundii 9	EDTA_2_0	-0.17	23735.74344	24697.94921	33093.30761	-0.11	1.51
Citrobacter freundii 9	EDTA_2_0	-0.13	20842.09669	29596.3287	37176.08464	-0.09	1.51
Citrobacter freundii 9	EDTA_2_5	-0.44	30304.20851	43413.26326	27067.55113	-0.29	1.51
Citrobacter freundii 9	EDTA_2_5	-0.4	31876.92061	43916.1222	30452.39151	-0.26	1.51
Citrobacter freundii 9	EDTA_2_5	-0.34	24198.04671	49348.41996	33923.40527	-0.22	1.51
Citrobacter freundii 9	EDTA_2_5	-0.37	19888.68647	43222.26428	26957.53142	-0.25	1.51
Citrobacter freundii 9	EDTA_3_0	-0.06	15232.53263	21000.78073	31618.69712	-0.04	1.51
Citrobacter freundii 9	EDTA_3_0	-0.13	24787.94221	25068.31187	37246.21453	-0.08	1.51
Citrobacter freundii 9	EDTA_3_0	-0.04	20372.50501	17763.44582	34527.61109	-0.03	1.51
Citrobacter freundii 9	EDTA_3_0	-0.15	25246.62532	14686.13812	28421.37791	-0.1	1.51
Citrobacter freundii 9	EDTA_3_5	-0.18	27443.57344	14758.55527	28034.84023	-0.12	1.51
Citrobacter freundii 9	EDTA_3_5	-0.13	13022.69063	14522.21904	20288.25906	-0.09	1.51
Citrobacter freundii 9	EDTA_3_5	-0.02	16786.16938	9027.001897	24874.61117	-0.01	1.51
Citrobacter freundii 9	EDTA_3_5	-0.09	26541.37939	16943.67141	35218.47935	-0.06	1.51
Citrobacter freundii 9	EDTA_4_0	-0.12	25303.62132	8817.165826	26008.53394	-0.08	1.51
Citrobacter freundii 9	EDTA_4_0	-0.2	28301.12558	9066.938311	23378.83015	-0.14	1.51
Citrobacter freundii 9	EDTA_4_0	-0.2	33808.64516	10580.62799	27965.01755	-0.13	1.51
Citrobacter freundii 9	EDTA_4_0	-0.2	30200.18708	16305.96785	29048.24204	-0.14	1.51
Citrobacter freundii 9	EDTA_5_0	-0.2	32280.55001	17926.35244	31740.96305	-0.13	1.51
Citrobacter freundii 9	EDTA_5_0	-0.23	32930.8911	19903.41175	31296.69875	-0.15	1.51
Citrobacter freundii 9	EDTA_5_0	-0.24	31700.58769	27000.82906	34163.7414	-0.16	1.51
Citrobacter freundii 9	EDTA_5_0	-0.21	33321.25741	23293.98133	34685.66403	-0.14	1.51
Citrobacter freundii 9	EDTA_6_0	0.28	9260.127461	4590.170441	26352.41763	0.18	1.51
Citrobacter freundii 9	EDTA_6_0	0.31	12061.05583	4734.141699	34661.66049	0.21	1.51
Citrobacter freundii 9	EDTA_6_0	0.16	12004.86821	4722.236513	23992.41345	0.1	1.51
Citrobacter freundii 9	EDTA_6_0	0.17	9604.452578	3616.880637	19449.3194	0.11	1.51
Citrobacter freundii 9	EDTA_7_0	0.48	5540.153098	2589.716815	24807.62406	0.32	1.51
Citrobacter freundii 9	EDTA_7_0	0.52	4972.737639	1849.101482	22527.08387	0.34	1.51
Citrobacter freundii 9	EDTA_7_0	0.42	3098.19624	950.446503	10700.83138	0.28	1.51
Citrobacter freundii 9	EDTA_7_0	0.21	8383.637624	2131.24818	16924.1813	0.14	1.51
negative control	N	-0.31	18299.7082	8266.220324	13068.23888	-0.2	1.51
negative control	N	-0.3	25475.47989	12151.84803	18841.39586	-0.2	1.51
negative control	N	0	6897.173617	3139.531196	10047.29572	0	1.51
negative control	N	-0.2	16390.37397	6779.756913	14706.69249	-0.13	1.51
positive control	P	1.51	411.7223641	148.0692668	18088.05587	1	1.51
positive control	P	1.8	200.7247032	84.43263756	18144.43932	1.2	1.51
positive control	P	1.87	225.270998	49.53364521	20308.82972	1.24	1.51
positive control	P	1.66	373.9007478	103.3286526	21924.85803	1.1	1.51
Salmonella sp. 10	1_0	1.06	1255.596964	2031.30607	37896.07763	0.74	1.74
Salmonella sp. 10	1_0	0.95	2163.532538	1745.641952	35084.62553	0.68	1.74
Salmonella sp. 10	1_0	0.99	2180.581526	2554.09125	46744.80752	0.71	1.74
Salmonella sp. 10	1_0	0.94	1802.792498	2812.200371	40360.37499	0.68	1.74
Salmonella sp. 10	1_5	1.31	971.4888834	546.0735265	31266.27246	0.89	1.74
Salmonella sp. 10	1_5	1.37	853.6808865	521.7644539	32069.4187	0.92	1.74
Salmonella sp. 10	1_5	1.34	1199.82856	551.7397368	38384.10715	0.91	1.74
Salmonella sp. 10	1_5	1.47	755.8148029	410.829715	34232.30656	0.98	1.74
Salmonella sp. 10	2_0	1.4	1079.19644	350.9278053	36013.81315	0.94	1.74
Salmonella sp. 10	2_0	1.33	1378.31983	509.0798234	40425.35413	0.9	1.74
Salmonella sp. 10	2_0	1.45	904.3215117	278.673058	33009.28565	0.97	1.74
Salmonella sp. 10	2_0	1.36	1407.297578	514.7912475	44089.86814	0.92	1.74
Salmonella sp. 10	2_5	1.49	859.52865	319.8002303	36122.30725	0.99	1.74
Salmonella sp. 10	2_5	1.33	1216.760574	483.84375	36653.16761	0.9	1.74
Salmonella sp. 10	2_5	1.43	1096.185269	418.8748227	40492.19356	0.95	1.74
Salmonella sp. 10	2_5	1.44	805.4117177	388.4850537	33222.60478	0.96	1.74
Salmonella sp. 10	3_0	1.33	1315.035669	611.9075977	41180.02238	0.9	1.74
Salmonella sp. 10	3_0	1.43	1076.446501	500.9847392	42323.03813	0.96	1.74
Salmonella sp. 10	3_0	1.32	1161.594063	544.5528562	35513.05675	0.89	1.74
Salmonella sp. 10	3_0	1.44	873.1045968	378.0447437	34081.97019	0.96	1.74
Salmonella sp. 10	3_5	1.39	992.8905063	277.0733072	31265.15631	0.93	1.74
Salmonella sp. 10	3_5	1.35	1178.607775	335.639031	33637.89813	0.91	1.74
Salmonella sp. 10	3_5	1.55	541.4951832	127.1098998	23841.20568	1.03	1.74
Salmonella sp. 10	3_5	1.4	1165.486224	207.3037606	34497.19477	0.94	1.74
Salmonella sp. 10	4_0	1.43	1032.761463	279.7405986	35493.46253	0.96	1.74
Salmonella sp. 10	4_0	1.51	558.1323488	215.7257703	25144.64238	1	1.74
Salmonella sp. 10	4_0	1.33	1672.506464	311.7248704	42151.57346	0.9	1.74
Salmonella sp. 10	4_0	1.31	1229.031737	303.3815193	31226.45614	0.89	1.74
Salmonella sp. 10	5_0	1.71	506.5587542	98.23307793	30967.20064	1.12	1.74
Salmonella sp. 10	5_0	1.67	747.4053943	89.18695094	39288.34053	1.1	1.74
Salmonella sp. 10	5_0	1.71	641.1557696	80.66781898	36995.11579	1.12	1.74
Salmonella sp. 10	5_0	1.67	589.0480807	130.1810925	33527.11179	1.09	1.74
Salmonella sp. 10	6_0	1.63	301.406013	90.23712731	16741.56365	1.07	1.74
Salmonella sp. 10	6_0	1.47	650.8456411	181.340723	24434.36615	0.98	1.74
Salmonella sp. 10	6_0	1.68	436.0955457	133.4767092	27373.00993	1.1	1.74
Salmonella sp. 10	6_0	1.65	356.0339961	126.7078519	21804.95357	1.09	1.74
Salmonella sp. 10	7_0	1.6	341.7247358	75.14153867	16580.91651	1.05	1.74
Salmonella sp. 10	7_0	1.67	271.6833648	73.77376242	16175.60798	1.09	1.74
Salmonella sp. 10	7_0	1.71	205.1500949	60.16718233	13521.87697	1.12	1.74
Salmonella sp. 10	7_0	1.63	306.2259544	38.57986052	14623.28596	1.07	1.74
Salmonella sp. 10	DPA_1_0	-0.24	33416.74376	12993.76875	26660.32307	-0.01	1.74
Salmonella sp. 10	DPA_1_0	-0.29	40330.86528	14291.56678	27923.15434	-0.04	1.74
Salmonella sp. 10	DPA_1_0	-0.26	41534.24272	13455.10172	30524.46873	-0.01	1.74
Salmonella sp. 10	DPA_1_0	-0.27	40965.65887	12845.16816	28798.98986	-0.02	1.74
Salmonella sp. 10	DPA_1_5	-0.1	32853.09704	13492.62621	36761.34905	0.07	1.74
Salmonella sp. 10	DPA_1_5	-0.15	38408.17022	13641.0271	36589.85542	0.04	1.74
Salmonella sp. 10	DPA_1_5	-0.14	26301.53637	11283.45824	27390.63426	0.05	1.74
Salmonella sp. 10	DPA_1_5	-0.16	38738.02324	12394.10436	35175.67041	0.04	1.74
Salmonella sp. 10	DPA_2_0	-0.3	48677.99832	12050.40966	30438.93445	-0.04	1.74
Salmonella sp. 10	DPA_2_0	-0.26	44159.62422	14523.99485	32231.52096	-0.02	1.74
Salmonella sp. 10	DPA_2_0	-0.27	48808.19881	17007.69503	35550.42794	-0.02	1.74
Salmonella sp. 10	DPA_2_0	-0.26	46190.78073	17334.89727	34649.7388	-0.02	1.74
Salmonella sp. 10	DPA_2_5	-0.04	22829.36327	10803.64952	30662.373	0.11	1.74
Salmonella sp. 10	DPA_2_5	-0.03	32232.06383	15265.21233	44353.36708	0.12	1.74
Salmonella sp. 10	DPA_2_5	-0.09	25508.67735	9642.581156	28485.48407	0.08	1.74
Salmonella sp. 10	DPA_2_5	-0.06	32305.89683	10597.43758	37614.2371	0.1	1.74
Salmonella sp. 10	DPA_3_0	-0.27	35474.06358	15732.61769	27802.86629	-0.02	1.74
Salmonella sp. 10	DPA_3_0	-0.25	40119.73644	14904.26678	31266.4871	-0.01	1.74
Salmonella sp. 10	DPA_3_0	-0.2	31261.61455	21162.35778	33438.43813	0.02	1.74
Salmonella sp. 10	DPA_3_0	-0.16	28897.39792	8291.861317	25529.79635	0.04	1.74
Salmonella sp. 10	DPA_3_5	0.11	17613.00733	7408.177666	32326.2414	0.2	1.74
Salmonella sp. 10	DPA_3_5	0.01	27581.57025	6840.431289	35589.03679	0.14	1.74
Salmonella sp. 10	DPA_3_5	0.05	18296.99429	7123.729902	28648.08168	0.16	1.74
Salmonella sp. 10	DPA_3_5	0.1	19180.35362	9279.064583	35875.61323	0.19	1.74
Salmonella sp. 10	DPA_4_0	0.33	12000.54109	2781.551346	31868.13965	0.32	1.74
Salmonella sp. 10	DPA_4_0	0.4	10352.73415	3024.983622	33984.99049	0.37	1.74
Salmonella sp. 10	DPA_4_0	0.36	10668.40791	2066.066893	29491.82082	0.34	1.74
Salmonella sp. 10	DPA_4_0	0.43	9301.036966	1629.208373	29383.24828	0.38	1.74
Salmonella sp. 10	DPA_5_0	1.12	2060.051355	341.8837549	31314.23024	0.78	1.74
Salmonella sp. 10	DPA_5_0	1.09	2111.544192	321.8511772	30226.95391	0.76	1.74
Salmonella sp. 10	DPA_5_0	1.34	1399.503321	228.6981229	35333.09961	0.9	1.74
Salmonella sp. 10	DPA_5_0	1.14	1873.563488	333.9145627	30813.03267	0.79	1.74
Salmonella sp. 10	DPA_6_0	0.95	1489.146289	218.2450664	15285.38114	0.68	1.74
Salmonella sp. 10	DPA_6_0	0.96	2048.640226	227.6619441	20686.77524	0.68	1.74
Salmonella sp. 10	DPA_6_0	1.13	2060.927594	303.03125	31666.58498	0.78	1.74
Salmonella sp. 10	DPA_6_0	1.1	2100.793547	306.88209	30218.07646	0.77	1.74
Salmonella sp. 10	DPA_7_0	1	1555.44149	257.2953609	18142.74759	0.71	1.74
Salmonella sp. 10	DPA_7_0	1.03	1599.819207	350.8151385	20918.27047	0.73	1.74
Salmonella sp. 10	DPA_7_0	0.87	1792.38693	285.7774539	15435.76713	0.63	1.74
Salmonella sp. 10	DPA_7_0	0.78	1996.314415	231.53432	13507.76423	0.58	1.74
Salmonella sp. 10	EDTA_1_0	0.21	4807.429801	12118.8906	27186.62714	0.25	1.74
Salmonella sp. 10	EDTA_1_0	0.07	11167.0087	16383.31749	32243.5578	0.17	1.74
Salmonella sp. 10	EDTA_1_0	0.06	12527.44578	21398.14178	39304.56047	0.17	1.74
Salmonella sp. 10	EDTA_1_0	0.07	9017.159714	14050.13549	27134.58733	0.17	1.74
Salmonella sp. 10	EDTA_1_5	-0.07	14929.89536	34332.77112	42251.4354	0.09	1.74
Salmonella sp. 10	EDTA_1_5	-0.12	12314.60358	15634.20824	21334.53894	0.07	1.74
Salmonella sp. 10	EDTA_1_5	-0.07	11309.41447	26203.15051	31945.08544	0.09	1.74
Salmonella sp. 10	EDTA_1_5	-0.07	11174.78319	21804.91637	27992.22331	0.09	1.74
Salmonella sp. 10	EDTA_2_0	0.68	1868.968064	2771.045066	22207.29581	0.52	1.74
Salmonella sp. 10	EDTA_2_0	0.69	2040.906533	4152.33108	30370.49542	0.53	1.74
Salmonella sp. 10	EDTA_2_0	0.43	7287.782744	4786.739037	32746.38859	0.38	1.74
Salmonella sp. 10	EDTA_2_0	0.56	4497.506337	3064.412683	27281.23062	0.45	1.74
Salmonella sp. 10	EDTA_2_5	0.9	1939.410272	2033.592926	31741.61897	0.65	1.74
Salmonella sp. 10	EDTA_2_5	0.84	2236.181398	1754.241524	27679.86345	0.62	1.74
Salmonella sp. 10	EDTA_2_5	0.83	2205.685663	1237.218478	23352.82317	0.61	1.74
Salmonella sp. 10	EDTA_2_5	0.79	2496.49821	2772.357605	32665.84429	0.59	1.74
Salmonella sp. 10	EDTA_3_0	0.72	2499.463992	2577.333984	26455.17766	0.55	1.74
Salmonella sp. 10	EDTA_3_0	0.62	4324.986961	3590.855898	32828.93836	0.49	1.74
Salmonella sp. 10	EDTA_3_0	0.51	4757.481207	4100.179091	28370.32185	0.42	1.74
Salmonella sp. 10	EDTA_3_0	0.42	4807.244569	4051.484462	23105.84131	0.37	1.74
Salmonella sp. 10	EDTA_3_5	0.53	4800.708712	2903.769896	26259.13866	0.44	1.74
Salmonella sp. 10	EDTA_3_5	0.55	5742.485732	3229.640038	31892.66932	0.45	1.74
Salmonella sp. 10	EDTA_3_5	0.62	4864.711788	2969.454041	32971.73826	0.49	1.74
Salmonella sp. 10	EDTA_3_5	0.53	6196.85149	2892.622551	30718.85436	0.44	1.74
Salmonella sp. 10	EDTA_4_0	1.4	1121.191257	308.4999003	36206.2054	0.94	1.74
Salmonella sp. 10	EDTA_4_0	1.32	1082.877674	273.6180653	28105.65905	0.89	1.74
Salmonella sp. 10	EDTA_4_0	1.4	802.0219015	184.4688791	24762.88231	0.94	1.74
Salmonella sp. 10	EDTA_4_0	1.45	475.4495627	126.0567248	17138.98469	0.97	1.74
Salmonella sp. 10	EDTA_5_0	1.32	992.252316	100.4589838	22897.05575	0.89	1.74
Salmonella sp. 10	EDTA_5_0	1.3	1018.07992	151.6834437	23400.94352	0.88	1.74
Salmonella sp. 10	EDTA_5_0	1.15	932.8142617	141.1875	15056.44629	0.79	1.74
Salmonella sp. 10	EDTA_5_0	1.18	721.8685017	92.89869624	12349.26242	0.81	1.74
Salmonella sp. 10	EDTA_6_0	1.51	525.574613	155.1918793	21831.2807	1	1.74
Salmonella sp. 10	EDTA_6_0	1.43	782.4081188	115.6575854	24144.3753	0.96	1.74
Salmonella sp. 10	EDTA_6_0	1.49	667.9722678	123.6872193	24660.08229	0.99	1.74
Salmonella sp. 10	EDTA_6_0	1.47	876.7718882	245.78125	32788.15432	0.98	1.74
Salmonella sp. 10	EDTA_7_0	1.54	363.7478082	77.96465611	15332.0497	1.02	1.74
Salmonella sp. 10	EDTA_7_0	1.45	529.2055688	92.20989057	17578.52561	0.97	1.74
Salmonella sp. 10	EDTA_7_0	1.54	517.4793407	136.6614383	22563.80445	1.02	1.74
Salmonella sp. 10	EDTA_7_0	1.6	517.8511924	98.69495215	24783.88645	1.06	1.74
negative control	N	-0.38	19791.96726	10668.15905	12740.38948	-0.09	1.74
negative control	N	-0.23	11605.58745	5053.814596	9801.383474	0	1.74
negative control	N	-0.36	15240.63368	8109.317229	10168.11062	-0.08	1.74
negative control	N	-0.35	12266.47357	5196.338912	7796.751356	-0.07	1.74
positive control	P	1.63	251.8125218	110.161279	15352.23563	1.07	1.74
positive control	P	1.51	318.5331445	135.0024069	14528.34261	1	1.74
positive control	P	1.66	290.5038912	77.30767803	16766.33696	1.09	1.74
positive control	P	1.67	340.4947243	139.8128927	22629.95043	1.1	1.74
Enterobacter kobei 11	1_0	1.27	1002.482035	386.4563606	25874.96522	0.89	1.74
Enterobacter kobei 11	1_0	1.27	1186.561002	397.3720845	29583.99288	0.89	1.74
Enterobacter kobei 11	1_0	1.31	1144.951014	431.75	31988.36008	0.91	1.74
Enterobacter kobei 11	1_0	1.42	965.0333488	297.8801709	32930.98016	0.97	1.74
Enterobacter kobei 11	1_5	1.42	796.3004152	308.2190291	28965.19725	0.98	1.74
Enterobacter kobei 11	1_5	1.4	936.5511721	476.9054355	35184.88403	0.96	1.74
Enterobacter kobei 11	1_5	1.34	1100.552987	417.7378737	33104.181	0.93	1.74
Enterobacter kobei 11	1_5	1.31	1265.109759	491.9878591	35691.59037	0.91	1.74
Enterobacter kobei 11	2_0	1.42	839.5403894	428.1524176	33107.05087	0.98	1.74
Enterobacter kobei 11	2_0	1.37	847.215404	379.0036547	28562.47519	0.95	1.74
Enterobacter kobei 11	2_0	1.49	617.7136218	340.2463709	29908.25073	1.02	1.74
Enterobacter kobei 11	2_0	1.41	666.3246305	258.277145	23659.20991	0.97	1.74
Enterobacter kobei 11	2_5	1.55	582.6261491	391.2380285	34574.46165	1.05	1.74
Enterobacter kobei 11	2_5	1.49	544.1887149	309.3494561	26554.22992	1.02	1.74
Enterobacter kobei 11	2_5	1.5	524.1345438	204.1083576	23115.62019	1.02	1.74
Enterobacter kobei 11	2_5	1.48	642.4608685	351.8999256	30242.86663	1.01	1.74
Enterobacter kobei 11	3_0	1.49	552.9981504	279.7380615	25820.27856	1.02	1.74
Enterobacter kobei 11	3_0	1.63	469.5231441	284.6559131	32383.78518	1.1	1.74
Enterobacter kobei 11	3_0	1.4	662.993411	389.5728674	26717.41077	0.97	1.74
Enterobacter kobei 11	3_0	1.57	475.3704603	267.9927205	27657.23083	1.06	1.74
Enterobacter kobei 11	3_5	1.59	329.8886269	166.6863283	19491.06995	1.08	1.74
Enterobacter kobei 11	3_5	1.41	452.6571546	227.4114125	17331.35169	0.97	1.74
Enterobacter kobei 11	3_5	1.51	759.0059605	330.1874384	35004.35786	1.03	1.74
Enterobacter kobei 11	3_5	1.61	586.5910679	244.8253976	33502.26165	1.08	1.74
Enterobacter kobei 11	4_0	1.53	476.1936497	192.7706609	22911.87722	1.04	1.74
Enterobacter kobei 11	4_0	1.54	485.7296663	176.9983758	23215.64645	1.05	1.74
Enterobacter kobei 11	4_0	1.46	635.4687013	202.5471139	24432.83914	1	1.74
Enterobacter kobei 11	4_0	1.38	661.8991795	296	22745.38189	0.95	1.74
Enterobacter kobei 11	5_0	1.45	607.5370378	245.48069	23792.47111	0.99	1.74
Enterobacter kobei 11	5_0	1.47	574.3968987	248.843078	24458.95164	1.01	1.74
Enterobacter kobei 11	5_0	1.58	508.5577845	202.7581338	27132.45822	1.07	1.74
Enterobacter kobei 11	5_0	1.47	916.7243465	259.6378159	34959.50455	1.01	1.74
Enterobacter kobei 11	6_0	1.7	409.2794887	129.8185413	26973.43458	1.14	1.74
Enterobacter kobei 11	6_0	1.57	300.9015027	133.138509	15996.84516	1.06	1.74
Enterobacter kobei 11	6_0	1.58	431.6603582	142.3267854	21998.58193	1.07	1.74
Enterobacter kobei 11	6_0	1.66	423.5379887	162.5197203	26784.60924	1.11	1.74
Enterobacter kobei 11	7_0	1.7	265.2288239	117.4275081	18981.48217	1.14	1.74
Enterobacter kobei 11	7_0	1.7	239.0928051	114.0123961	17859.95706	1.14	1.74
Enterobacter kobei 11	7_0	1.69	237.8609837	137.804126	18587.32523	1.13	1.74
Enterobacter kobei 11	7_0	1.74	155.722656	47.04272796	11106.96784	1.16	1.74
Enterobacter kobei 11	DPA_1_0	-0.36	34379.54783	15790.08825	22097.43831	-0.04	1.74
Enterobacter kobei 11	DPA_1_0	-0.26	25392.01282	11834.59108	20290.53307	0.01	1.74
Enterobacter kobei 11	DPA_1_0	-0.43	44428.59219	16600.30532	22430.7352	-0.09	1.74
Enterobacter kobei 11	DPA_1_0	-0.33	43273.51285	16862.70441	28405.14696	-0.02	1.74
Enterobacter kobei 11	DPA_1_5	-0.17	23239.13817	12139.8581	23773.51669	0.06	1.74
Enterobacter kobei 11	DPA_1_5	-0.24	31674.27111	16442.8264	27530.86853	0.02	1.74
Enterobacter kobei 11	DPA_1_5	-0.21	23215.4523	15870.11903	23910.00091	0.04	1.74
Enterobacter kobei 11	DPA_1_5	-0.3	32221.67409	17284.42422	25006.50427	-0.01	1.74
Enterobacter kobei 11	DPA_2_0	-0.25	32725.98808	12327.55762	25269.09097	0.02	1.74
Enterobacter kobei 11	DPA_2_0	-0.15	31228.02359	12902.67845	31255.08073	0.08	1.74
Enterobacter kobei 11	DPA_2_0	-0.03	18636.50826	7483.764977	24400.0121	0.15	1.74
Enterobacter kobei 11	DPA_2_0	-0.09	18971.80717	7953.804539	21879.33553	0.11	1.74
Enterobacter kobei 11	DPA_2_5	-0.13	37226.01653	8404.938325	33966.00164	0.09	1.74
Enterobacter kobei 11	DPA_2_5	-0.14	31759.2027	5594.046619	27139.19569	0.08	1.74
Enterobacter kobei 11	DPA_2_5	0.05	11949.49546	7278.74654	21593.15567	0.19	1.74
Enterobacter kobei 11	DPA_2_5	0.05	15820.1851	6432.960585	24683.07353	0.19	1.74
Enterobacter kobei 11	DPA_3_0	1.11	1831.358005	286.6658748	27229.09241	0.8	1.74
Enterobacter kobei 11	DPA_3_0	1.06	1028.414078	272.5314552	14808.42763	0.77	1.74
Enterobacter kobei 11	DPA_3_0	1.08	1024.12041	259.8353296	15412.38261	0.78	1.74
Enterobacter kobei 11	DPA_3_0	1.23	1360.606404	398.6933473	30057.78465	0.87	1.74
Enterobacter kobei 11	DPA_3_5	1.2	1664.307107	402.8993924	32420.63066	0.85	1.74
Enterobacter kobei 11	DPA_3_5	1.12	1022.918077	361.0834158	18224.73057	0.8	1.74
Enterobacter kobei 11	DPA_3_5	1.27	1059.591263	208.1082801	23366.16767	0.89	1.74
Enterobacter kobei 11	DPA_3_5	1.17	1406.010406	461.4838476	27730.13156	0.83	1.74
Enterobacter kobei 11	DPA_4_0	1.09	1347.632374	485.6762519	22427.49529	0.79	1.74
Enterobacter kobei 11	DPA_4_0	1.11	1714.097666	494.1594186	28178.33563	0.8	1.74
Enterobacter kobei 11	DPA_4_0	1.25	922.5557714	285.9125055	21257.87529	0.88	1.74
Enterobacter kobei 11	DPA_4_0	1.23	1062.489338	464.5866013	26100.20154	0.87	1.74
Enterobacter kobei 11	DPA_5_0	1.12	1785.147726	764.5900376	33627.96228	0.81	1.74
Enterobacter kobei 11	DPA_5_0	1.11	1659.914555	768.0642438	31165.97173	0.8	1.74
Enterobacter kobei 11	DPA_5_0	1.25	1008.006182	344.4135818	23925.85643	0.88	1.74
Enterobacter kobei 11	DPA_5_0	1.2	1196.656461	261.6205462	22965.6792	0.85	1.74
Enterobacter kobei 11	DPA_6_0	1.15	1447.843652	309.0883892	24987.82309	0.82	1.74
Enterobacter kobei 11	DPA_6_0	1.09	1808.013969	550.6362375	29200.76914	0.79	1.74
Enterobacter kobei 11	DPA_6_0	1.12	1414.087624	334.273339	22830.15976	0.8	1.74
Enterobacter kobei 11	DPA_6_0	1.14	1477.810948	433.0982072	26113.50963	0.81	1.74
Enterobacter kobei 11	DPA_7_0	1.17	1257.541739	320.6136036	23109.24691	0.83	1.74
Enterobacter kobei 11	DPA_7_0	0.97	2260.811972	348.9544993	24564.89758	0.72	1.74
Enterobacter kobei 11	DPA_7_0	1.19	738.1844307	239.2803605	15244.16405	0.85	1.74
Enterobacter kobei 11	DPA_7_0	1.03	1986.687934	401.8143515	25439.72871	0.75	1.74
Enterobacter kobei 11	EDTA_1_0	0.92	1393.696799	2842.657088	35611.92766	0.69	1.74
Enterobacter kobei 11	EDTA_1_0	0.8	1273.565391	3533.423632	30562.46733	0.62	1.74
Enterobacter kobei 11	EDTA_1_0	0.73	2543.791517	4054.704343	35667.45775	0.58	1.74
Enterobacter kobei 11	EDTA_1_0	0.82	2015.190601	4031.119717	39962.37301	0.63	1.74
Enterobacter kobei 11	EDTA_1_5	1.44	289.443029	311.1351906	16434.43748	0.99	1.74
Enterobacter kobei 11	EDTA_1_5	1.23	903.4342089	1141.340361	34400.53243	0.87	1.74
Enterobacter kobei 11	EDTA_1_5	1.21	1063.895087	1140.2264	35550.67338	0.86	1.74
Enterobacter kobei 11	EDTA_1_5	1.26	1092.309681	950.1187052	36913.93529	0.88	1.74
Enterobacter kobei 11	EDTA_2_0	1.46	625.1348631	313.6929655	27076.52001	1	1.74
Enterobacter kobei 11	EDTA_2_0	1.46	563.8019964	362.1929848	26428.29106	1	1.74
Enterobacter kobei 11	EDTA_2_0	1.32	1272.383127	458.0183301	36240.63674	0.92	1.74
Enterobacter kobei 11	EDTA_2_0	1.37	923.0896287	380.8437319	30704.95371	0.95	1.74
Enterobacter kobei 11	EDTA_2_5	1.45	583.2098316	331.2062827	25682.66744	0.99	1.74
Enterobacter kobei 11	EDTA_2_5	1.5	750.1742011	398.7723291	36295.03328	1.02	1.74
Enterobacter kobei 11	EDTA_2_5	1.39	828.8848207	324	28410.26757	0.96	1.74
Enterobacter kobei 11	EDTA_2_5	1.33	649.2598167	399.8115626	22565.97316	0.93	1.74
Enterobacter kobei 11	EDTA_3_0	1.54	544.1984445	204.8125	25715.76301	1.04	1.74
Enterobacter kobei 11	EDTA_3_0	1.51	737.5530084	246.4349717	32065.07532	1.03	1.74
Enterobacter kobei 11	EDTA_3_0	1.5	668.0497523	300.07641	30689.07817	1.02	1.74
Enterobacter kobei 11	EDTA_3_0	1.48	540.0825334	224.9589244	22854.59544	1.01	1.74
Enterobacter kobei 11	EDTA_3_5	1.49	794.5238378	217.9633256	30978.52293	1.01	1.74
Enterobacter kobei 11	EDTA_3_5	1.63	498.1794781	172.570955	28450.51171	1.1	1.74
Enterobacter kobei 11	EDTA_3_5	1.56	637.0964079	211.311614	30944.78927	1.06	1.74
Enterobacter kobei 11	EDTA_3_5	1.49	526.6165516	199.5171591	22388.97877	1.02	1.74
Enterobacter kobei 11	EDTA_4_0	1.6	649.2082877	193.0969247	33912.29595	1.08	1.74
Enterobacter kobei 11	EDTA_4_0	1.69	387.8839617	141.4115187	26200.59104	1.13	1.74
Enterobacter kobei 11	EDTA_4_0	1.54	448.7528031	129.77163	20219.23808	1.05	1.74
Enterobacter kobei 11	EDTA_4_0	1.61	604.9343736	229.355923	33797.47781	1.08	1.74
Enterobacter kobei 11	EDTA_5_0	1.5	616.1935834	247.0560345	27115.2636	1.02	1.74
Enterobacter kobei 11	EDTA_5_0	1.52	637.3824284	239.5218398	28813.69616	1.03	1.74
Enterobacter kobei 11	EDTA_5_0	1.47	796.0886065	284.1350661	32168.98877	1.01	1.74
Enterobacter kobei 11	EDTA_5_0	1.55	362.5162547	232.5103877	21080.85955	1.05	1.74
Enterobacter kobei 11	EDTA_6_0	1.57	406.6972782	171.4754657	21715.68734	1.07	1.74
Enterobacter kobei 11	EDTA_6_0	1.58	362.4643826	95.3427512	17589.59121	1.07	1.74
Enterobacter kobei 11	EDTA_6_0	1.59	451.0172443	149.2048806	23579.0094	1.08	1.74
Enterobacter kobei 11	EDTA_6_0	1.56	544.500582	191.5429447	26985.484	1.06	1.74
Enterobacter kobei 11	EDTA_7_0	1.76	224.1688923	124.6677257	20148.28602	1.17	1.74
Enterobacter kobei 11	EDTA_7_0	1.77	237.3551439	75.87861959	18382.02297	1.18	1.74
Enterobacter kobei 11	EDTA_7_0	1.65	206.2234469	87.99641308	13095.23911	1.11	1.74
Enterobacter kobei 11	EDTA_7_0	1.6	353.0316388	71.46259004	16883.38011	1.08	1.74
negative control	N	-0.35	26837.86323	26307.15724	23534.27341	-0.04	1.74
negative control	N	-0.41	28251.03448	27479.51366	21589.77632	-0.07	1.74
negative control	N	-0.41	22382.23663	23826.76009	17839.33887	-0.07	1.74
negative control	N	-0.28	12234.50073	12213.88982	12749.94843	0	1.74
positive control	P	1.79	170.0264576	70.68904879	14787.32386	1.19	1.74
positive control	P	1.46	449.3828915	252.8357644	20254.33135	1	1.74
positive control	P	1.74	192.2364183	105.6656333	16219.21706	1.16	1.74
positive control	P	1.6	188.2854646	100.3813229	11385.46664	1.08	1.74
Klebsiella pneumoniae 12	1_0	1.41	919.8590048	314.4500318	31602.13453	0.99	1.62
Klebsiella pneumoniae 12	1_0	1.39	870.7404319	347.6097824	30228.88034	0.99	1.62
Klebsiella pneumoniae 12	1_0	1.47	687.3850588	358.2993868	30648.92691	1.03	1.62
Klebsiella pneumoniae 12	1_0	1.33	1361.621937	572.2923877	41208.62006	0.95	1.62
Klebsiella pneumoniae 12	1_5	1.46	898.3378262	255.6683521	33618.18442	1.03	1.62
Klebsiella pneumoniae 12	1_5	1.49	923.8110783	388.3668746	40371.25436	1.04	1.62
Klebsiella pneumoniae 12	1_5	1.39	1312.073438	458.9743075	43262.52537	0.98	1.62
Klebsiella pneumoniae 12	1_5	1.47	423.8870912	176.8843586	17663.09866	1.03	1.62
Klebsiella pneumoniae 12	2_0	1.54	786.6545662	200.8256761	33935.60189	1.07	1.62
Klebsiella pneumoniae 12	2_0	1.53	874.5763064	301.0503279	39527.87495	1.07	1.62
Klebsiella pneumoniae 12	2_0	1.4	740.5753946	319.6796095	26520.99143	0.99	1.62
Klebsiella pneumoniae 12	2_0	1.45	732.2526415	321.6990227	29504.71887	1.02	1.62
Klebsiella pneumoniae 12	2_5	1.57	702.9254062	326.6193078	38510.65658	1.1	1.62
Klebsiella pneumoniae 12	2_5	1.48	664.9405003	390.8210932	31972.41197	1.04	1.62
Klebsiella pneumoniae 12	2_5	1.38	1176.710372	538.1851352	41427.61836	0.98	1.62
Klebsiella pneumoniae 12	2_5	1.49	860.5105615	395.9405035	38458.9593	1.04	1.62
Klebsiella pneumoniae 12	3_0	1.47	727.1906124	259.1472147	28918.07001	1.03	1.62
Klebsiella pneumoniae 12	3_0	1.33	1011.700388	305.9935782	28141.10511	0.95	1.62
Klebsiella pneumoniae 12	3_0	1.34	1140.715625	470.5647347	35158.34977	0.95	1.62
Klebsiella pneumoniae 12	3_0	1.51	733.0320884	290.736687	33494.79946	1.06	1.62
Klebsiella pneumoniae 12	3_5	1.43	661.3225755	237.7564583	24472.95443	1.01	1.62
Klebsiella pneumoniae 12	3_5	1.41	929.2461338	228.5489001	29610.53895	0.99	1.62
Klebsiella pneumoniae 12	3_5	1.27	1537.549107	300.2751365	34049.29927	0.91	1.62
Klebsiella pneumoniae 12	3_5	1.31	1312.142047	300.381388	32809.05733	0.93	1.62
Klebsiella pneumoniae 12	4_0	1.48	545.2303395	123.3677408	20198.69567	1.04	1.62
Klebsiella pneumoniae 12	4_0	1.46	634.5793855	153.6396269	22682.52157	1.03	1.62
Klebsiella pneumoniae 12	4_0	1.49	869.9003746	283.0657509	35800.166	1.05	1.62
Klebsiella pneumoniae 12	4_0	1.51	825.0097269	237.4911138	34077.87183	1.05	1.62
Klebsiella pneumoniae 12	5_0	1.49	922.3489666	220.90625	35203.56968	1.04	1.62
Klebsiella pneumoniae 12	5_0	1.51	683.7567624	170.6298759	27485.26762	1.06	1.62
Klebsiella pneumoniae 12	5_0	1.49	695.7127535	216.2072754	28048.26226	1.04	1.62
Klebsiella pneumoniae 12	6_0	1.64	217.2617351	66.484375	12487.09569	1.14	1.62
Klebsiella pneumoniae 12	6_0	1.48	782.4368814	161.4892837	28286.67311	1.04	1.62
Klebsiella pneumoniae 12	6_0	1.57	501.4225507	185.7117643	25379.6248	1.09	1.62
Klebsiella pneumoniae 12	6_0	1.55	630.119223	190.9827245	29340.09451	1.08	1.62
Klebsiella pneumoniae 12	7_0	1.43	482.6516547	55.97290355	14384.62845	1.01	1.62
Klebsiella pneumoniae 12	7_0	1.31	647.6369269	113.8039601	15476.37832	0.93	1.62
Klebsiella pneumoniae 12	7_0	1.56	556.6566571	156.0377421	25992.62304	1.09	1.62
Klebsiella pneumoniae 12	7_0	1.44	749.1777549	134.5255782	24303.21536	1.01	1.62
Klebsiella pneumoniae 12	DPA_1_0	-0.28	48164.08006	28659.91444	39857.95308	-0.05	1.62
Klebsiella pneumoniae 12	DPA_1_0	-0.35	44216.81046	20009.54135	28880.36621	-0.09	1.62
Klebsiella pneumoniae 12	DPA_1_0	-0.35	40421.03856	33969.27839	33410.99688	-0.09	1.62
Klebsiella pneumoniae 12	DPA_1_0	-0.31	38602.04198	27704.95461	32279.62962	-0.07	1.62
Klebsiella pneumoniae 12	DPA_1_5	-0.4	46490.06255	30950.77087	30816.53171	-0.12	1.62
Klebsiella pneumoniae 12	DPA_1_5	-0.35	35515.81328	24051.19767	26367.12749	-0.09	1.62
Klebsiella pneumoniae 12	DPA_1_5	-0.32	35290.68615	24110.62334	28690.83637	-0.07	1.62
Klebsiella pneumoniae 12	DPA_1_5	-0.29	42992.87853	24899.73325	35161.69169	-0.05	1.62
Klebsiella pneumoniae 12	DPA_2_0	-0.29	32010.04419	22705.59298	28063.64108	-0.06	1.62
Klebsiella pneumoniae 12	DPA_2_0	-0.26	36641.97653	23585.74519	33188.74142	-0.04	1.62
Klebsiella pneumoniae 12	DPA_2_0	-0.27	51028.00775	21958.26474	38815.65242	-0.05	1.62
Klebsiella pneumoniae 12	DPA_2_0	-0.37	44011.27374	16959.8946	26295.93517	-0.1	1.62
Klebsiella pneumoniae 12	DPA_2_5	-0.42	39718.61893	17953.36689	21921.65609	-0.14	1.62
Klebsiella pneumoniae 12	DPA_2_5	-0.32	41807.21057	17519.688	28391.9455	-0.07	1.62
Klebsiella pneumoniae 12	DPA_2_5	-0.31	45762.49848	28397.94271	36274.34203	-0.07	1.62
Klebsiella pneumoniae 12	DPA_2_5	-0.34	38880.00976	16070.50028	25122.0118	-0.09	1.62
Klebsiella pneumoniae 12	DPA_3_0	-0.48	45334.58082	36589.07563	27037.54113	-0.17	1.62
Klebsiella pneumoniae 12	DPA_3_0	-0.47	42316.20028	31819.60318	25169.89313	-0.17	1.62
Klebsiella pneumoniae 12	DPA_3_0	-0.36	49011.02566	32851.80368	35992.18227	-0.1	1.62
Klebsiella pneumoniae 12	DPA_3_0	-0.39	48776.34805	33019.13564	33292.89437	-0.12	1.62
Klebsiella pneumoniae 12	DPA_3_5	-0.39	42337.43865	35119.12616	31424.0702	-0.12	1.62
Klebsiella pneumoniae 12	DPA_3_5	-0.47	48467.75004	32605.53287	27777.53805	-0.16	1.62
Klebsiella pneumoniae 12	DPA_3_5	-0.42	45215.66558	39012.99248	32342.78005	-0.13	1.62
Klebsiella pneumoniae 12	DPA_3_5	-0.37	45602.22083	35035.82366	34094.86528	-0.11	1.62
Klebsiella pneumoniae 12	DPA_4_0	-0.21	41953.35729	16901.97757	36043.30129	-0.01	1.62
Klebsiella pneumoniae 12	DPA_4_0	-0.12	27950.32899	14883.56311	32422.07896	0.05	1.62
Klebsiella pneumoniae 12	DPA_4_0	-0.07	28002.20247	15283.51295	36934.75443	0.08	1.62
Klebsiella pneumoniae 12	DPA_4_0	-0.07	20135.94828	10826.15058	26182.42301	0.08	1.62
Klebsiella pneumoniae 12	DPA_5_0	-0.13	34795.30489	13428.17861	36062.15455	0.05	1.62
Klebsiella pneumoniae 12	DPA_5_0	-0.22	31756.79026	15300.65226	28267.89619	-0.01	1.62
Klebsiella pneumoniae 12	DPA_5_0	-0.13	37728.62247	8805.152139	34582.63217	0.04	1.62
Klebsiella pneumoniae 12	DPA_5_0	-0.14	36173.81758	12484.96393	35500.39506	0.04	1.62
Klebsiella pneumoniae 12	DPA_6_0	-0.22	38484.11332	11676.71319	29961.28755	-0.01	1.62
Klebsiella pneumoniae 12	DPA_6_0	-0.23	49384.38221	15020.20179	37755.4206	-0.02	1.62
Klebsiella pneumoniae 12	DPA_6_0	-0.19	40092.93839	15999.33861	35910.5496	0	1.62
Klebsiella pneumoniae 12	DPA_6_0	-0.16	35009.60715	9460.925351	30924.37955	0.03	1.62
Klebsiella pneumoniae 12	DPA_7_0	-0.03	35395.01198	4605.83847	37278.85213	0.11	1.62
Klebsiella pneumoniae 12	DPA_7_0	-0.02	33505.2442	4884.047947	36627.44959	0.11	1.62
Klebsiella pneumoniae 12	DPA_7_0	0.04	28445.37967	3123.953417	34281.69925	0.15	1.62
Klebsiella pneumoniae 12	DPA_7_0	0.01	33883.8032	4128.747232	38686.50589	0.13	1.62
Klebsiella pneumoniae 12	EDTA_1_0	-0.17	26136.30551	22910.94363	33396.14522	0.02	1.62
Klebsiella pneumoniae 12	EDTA_1_0	-0.13	19987.35394	14985.77325	25977.22371	0.04	1.62
Klebsiella pneumoniae 12	EDTA_1_0	-0.23	32960.7666	39372.72042	42906.69745	-0.02	1.62
Klebsiella pneumoniae 12	EDTA_1_0	-0.15	14792.55112	38816.48424	38137.48273	0.03	1.62
Klebsiella pneumoniae 12	EDTA_1_5	-0.16	16524.24666	33039.8133	34307.62723	0.03	1.62
Klebsiella pneumoniae 12	EDTA_1_5	-0.16	10531.0419	27477.10619	26291.01554	0.03	1.62
Klebsiella pneumoniae 12	EDTA_1_5	-0.25	23939.06612	31990.05064	31574.89029	-0.03	1.62
Klebsiella pneumoniae 12	EDTA_1_5	-0.31	7113.046836	22959.26577	14831.69191	-0.07	1.62
Klebsiella pneumoniae 12	EDTA_2_0	0.32	3549.314477	9072.415136	26174.15795	0.32	1.62
Klebsiella pneumoniae 12	EDTA_2_0	0.27	4818.800011	10027.86729	27840.25569	0.29	1.62
Klebsiella pneumoniae 12	EDTA_2_0	0.3	4394.888856	12071.11731	33209.36879	0.31	1.62
Klebsiella pneumoniae 12	EDTA_2_0	0.23	6023.395958	12786.09539	32298.41635	0.27	1.62
Klebsiella pneumoniae 12	EDTA_2_5	0.17	6324.254906	10303.58379	24526.42085	0.23	1.62
Klebsiella pneumoniae 12	EDTA_2_5	0.13	10280.52664	15424.44847	34426.06259	0.2	1.62
Klebsiella pneumoniae 12	EDTA_2_5	0.05	6865.935898	18663.92308	28862.38199	0.16	1.62
Klebsiella pneumoniae 12	EDTA_2_5	-0.03	20211.92357	18585.90498	36601.49745	0.11	1.62
Klebsiella pneumoniae 12	EDTA_3_0	0.3	10507.34374	9419.380904	39807.21766	0.31	1.62
Klebsiella pneumoniae 12	EDTA_3_0	0.3	7901.845638	9714.319534	35252.04026	0.31	1.62
Klebsiella pneumoniae 12	EDTA_3_0	0.3	5727.451106	8385.272637	28124.50442	0.31	1.62
Klebsiella pneumoniae 12	EDTA_3_0	0.37	5097.761151	7285.733546	28699.00333	0.35	1.62
Klebsiella pneumoniae 12	EDTA_3_5	0.09	17578.6466	7675.70286	31362.63071	0.18	1.62
Klebsiella pneumoniae 12	EDTA_3_5	0.22	11857.79722	7402.607943	31870.73448	0.26	1.62
Klebsiella pneumoniae 12	EDTA_3_5	0.31	6819.756086	7928.124176	30249.72516	0.32	1.62
Klebsiella pneumoniae 12	EDTA_3_5	0.29	6944.157482	8393.208767	29964.88538	0.3	1.62
Klebsiella pneumoniae 12	EDTA_4_0	0.54	8381.600929	1800.863578	34983.53318	0.46	1.62
Klebsiella pneumoniae 12	EDTA_4_0	0.47	10425.012	2412.71875	37780.27123	0.41	1.62
Klebsiella pneumoniae 12	EDTA_4_0	0.45	11146.91906	2518.486412	38099.33146	0.4	1.62
Klebsiella pneumoniae 12	EDTA_4_0	0.57	6798.201414	2090.025617	33217.74662	0.48	1.62
Klebsiella pneumoniae 12	EDTA_5_0	0.24	11304.74434	3068.039664	24920.4375	0.27	1.62
Klebsiella pneumoniae 12	EDTA_5_0	0.08	11511.77389	2826.089535	17365.2312	0.18	1.62
Klebsiella pneumoniae 12	EDTA_5_0	0.36	6505.373843	3202.045156	22241.41227	0.35	1.62
Klebsiella pneumoniae 12	EDTA_5_0	0.42	6958.002872	1874.646266	23015.98761	0.38	1.62
Klebsiella pneumoniae 12	EDTA_6_0	0.44	8800.321033	4790.700452	37373.83214	0.4	1.62
Klebsiella pneumoniae 12	EDTA_6_0	0.3	10468.90464	3922.030468	28633.94802	0.31	1.62
Klebsiella pneumoniae 12	EDTA_6_0	0.4	4931.699484	1899.800386	17011.39658	0.37	1.62
Klebsiella pneumoniae 12	EDTA_6_0	0.45	8103.965544	3146.11627	31570.88082	0.4	1.62
Klebsiella pneumoniae 12	EDTA_7_0	0.09	12279.46769	7636.62424	24387.25083	0.18	1.62
Klebsiella pneumoniae 12	EDTA_7_0	0.15	14576.05316	6869.511837	30489.29911	0.22	1.62
Klebsiella pneumoniae 12	EDTA_7_0	0.36	9234.445646	5353.44971	33599.43201	0.35	1.62
Klebsiella pneumoniae 12	EDTA_7_0	0.37	8631.045505	3651.557143	28910.19389	0.35	1.62
negative control	N	-0.35	23221.74361	17473.48305	18238.57615	-0.09	1.62
negative control	N	-0.43	30498.46931	11141.5848	15591.65661	-0.14	1.62
negative control	N	-0.52	18919.42317	8611.599557	8272.77587	-0.2	1.62
negative control	N	-0.2	13175.79857	7279.381533	12886.65521	0	1.62
positive control	P	1.58	299.21211	92.26157934	15004.42956	1.1	1.62
positive control	P	1.42	368.8942877	131.4019666	13074.48026	1	1.62
positive control	P	1.59	499.9466669	110.8347838	23997.52492	1.11	1.62
positive control	P	1.6	456.6267122	154.5717506	24162.79749	1.11	1.62
